# Supplementary material for: Cumulative exposure to ionising radiation from diagnostic imaging tests: a 12-year follow-up population-based analysis in Spain
Source: PubMed Central journal article supplement — BMJ Open. 2019 Sep 18;9(9):e030905. doi: 10.1136/bmjopen-2019-030905 (PMC6756468; doi:10.1136/bmjopen-2019-030905), 2019-09-18
Supplement: bmjopen-2019-030905.draft_revisions.pdf [file bmjopen-2019-030905.draft_revisions.pdf]

# BMJ Open

BMJ Open is committed to open peer review. As part of this commitment we make the peer review history of every article we publish publicly available.

When an article is published we post the peer reviewers' comments and the authors' responses online. We also post the versions of the paper that were used during peer review. These are the versions that the peer review comments apply to.

The versions of the paper that follow are the versions that were submitted during the peer review process. They are not the versions of record or the final published versions. They should not be cited or distributed as the published version of this manuscript.

BMJ Open is an open access journal and the full, final, typeset and author-corrected version of record of the manuscript is available on our site with no access controls, subscription charges or pay-per-view fees (<http://bmjopen.bmj.com>).

If you have any questions on BMJ Open's open peer review process please email [info.bmjopen@bmj.com](mailto:info.bmjopen@bmj.com)

# BMJ Open

## **Cumulative exposure to ionizing radiation from diagnostic imaging procedures: a 12-year follow-up population-based analysis.**

|                               |                                                                                                                                                             |
|-------------------------------|-------------------------------------------------------------------------------------------------------------------------------------------------------------|
| Journal:                      | <i>BMJ Open</i>                                                                                                                                             |
| Manuscript ID                 | bmjopen-2019-030905                                                                                                                                         |
| Article Type:                 | Research                                                                                                                                                    |
| Date Submitted by the Author: | 05-Apr-2019                                                                                                                                                 |
| Complete List of Authors:     | Lumbreras Lacarra, Blanca; Miguel Hernandez University of Elche, Salinas, Josee María<br>Gonzalez-Alvarez, Isabel; Hospital San Juan de Alicante, Radiology |
| Keywords:                     | RADIOLOGY & IMAGING, EPIDEMIOLOGY, PREVENTIVE MEDICINE                                                                                                      |
|                               |                                                                                                                                                             |

SCHOLARONE™  
Manuscripts

1  
2  
3 **Title: Cumulative exposure to ionizing radiation from diagnostic imaging**  
4 **procedures: a 12-year follow-up population-based analysis.**  
5  
6  
7

8 **Authors: Lumbreras B\*, Salinas JM, González-Álvarez I.**  
9  
10  
11  
12  
13  
14  
15  
16

- 17 - Blanca Lumbreras (\*) Corresponding author:  
18  
19 Department of Public Health, History of Science and Gynecology, Miguel  
20 Hernández University , and CIBER en Epidemiología y Salud Pública.  
21  
22 Crtra Alicante-Valencia km 81. Sant Joan d'Alacant, 03550, Alicante,  
23  
24 Spain.  
25  
26 Phone number: +34965919510  
27  
28 Email: [blumbreras@umh.es](mailto:blumbreras@umh.es)  
29  
30 ORCID: 0000-0003-1665-0860  
31  
32  
33 - José María Salinas  
34  
35 Informatic Department, San Juan Hospital, Spain  
36  
37 Email: [salinas\\_josser@gva.es](mailto:salinas_josser@gva.es).  
38  
39  
40 - Isabel González-Álvarez  
41  
42 Radiodiagnostic Department, San Juan Hospital, Spain  
43  
44 Email: [gonzalez\\_isa@gva.es](mailto:gonzalez_isa@gva.es)  
45  
46  
47  
48  
49  
50  
51  
52  
53  
54  
55  
56  
57  
58  
59  
60

## Abstract

**Objectives:** To calculate each patient's cumulative radiation exposure and the recurrent tests during a 12-year study period, according to sex and age, in a cohort of patients in routine practice.

**Design:** Retrospective cohort study.

**Setting:** A general hospital with a catchment population of 224,751 people, in the Southeast of Spain.

**Participants:** Population belonged to the catchment area of that hospital during the year 2007. We collected all consecutive diagnostic imaging tests undergone by this population until 31st December 2018. We excluded: imaging tests that did not involve radiation exposure and patients who had an imagen test in this hospital but did not belong to its catchment area.

**Main outcome measures:** The cumulative incidence radiation exposure and the recurrent imaging tests by sex and age at each at entry of study. We also collected the patients' clinical context (patients with malignancy history).

**Results:** Of the 224,751 people, 154,520 (68.8%) underwent an imaging test. The population had 1,335,752 imaging tests during the period of study: 1,110,077 (83.0%) plain radiography; 156,848 (11.8%) CT; 63,157 (4.8%) fluoroscopy, and 5,670 (0.4%) interventional radiography. 25.4% of the patients who had a CT, underwent 5 or more CTs (5.4% in the 0 to 15 age group); 9.7% of the patients who had a fluoroscopy examination, underwent 5 or more fluoroscopy examinations (2.1% in the 0 to 15 age group. A total of 7142 (4.6%) patients received more than 50 mSv, with differences in men and women and

1  
2  
3 according to age. Out of 2,298 patients who received more than 100 mSv, 620  
4  
5 (27.0 %) had no malignancy history.  
6  
7

8 **Conclusions:** A significant proportion of patients received doses higher than 50  
9  
10 mSv during the 12-year period of study. The rate of recurrent examinations was  
11  
12 high, especially in older patients, but also relevant in the 0 to 15 age group.  
13  
14  
15

16  
17  
18 **Article summary section: Strengths and limitations of this study.**  
19

- 20  
21 - This is the first study that quantifies the cumulative radiation exposure  
22  
23 and recurrent imaging test in clinical practice, following the Basic Safety  
24  
25 Standards Directive adopted by the European Union (EU) in 2013.  
26  
27 - The strength of this study is that it evaluates all radiological  
28  
29 investigations performed in a cohort of 224,751 patients in routine  
30  
31 practice during a 12-year study period, according to sex and age.  
32  
33 - We used the available evidence to estimate the effective dose for each  
34  
35 examination, as is proposed by the dosedatamed project. This is not  
36  
37 ideal, but it does not affect the overall result.  
38  
39  
40  
41  
42  
43  
44  
45  
46  
47  
48  
49  
50  
51  
52  
53  
54  
55  
56  
57  
58  
59  
60

## Introduction

The Basic Safety Standards Directive was adopted by the European Union (EU) in 2013<sup>1</sup> to be transposed into national law by 6 February 2018. One key and innovative surveillance mechanism in this revised directive is to record the radiation dose received by each patient undergoing a medical imaging test. The directive mainly focuses on CT and procedures involving interventional radiology, all of which are associated with a relatively high dose of radiation. Other diagnostic procedures such as conventional radiography, however, are also frequently repeated in patients during their lives with a potential impact on health and could be included in these evaluations. However, these evaluations have not still been developed in the European countries.

A full evaluation of the radiation exposure from all medical diagnostic procedures in Europe has been previously carried out in the project DoseDataMed I<sup>2</sup> and II<sup>3</sup>. This project, based on national surveys, includes information on 36 European countries regarding population frequencies and radiation dose of x-ray and nuclear medicine radiodiagnostic procedures. Although this project has led to a significant advance in the evaluation of population doses, we still do not have data regarding the cumulative dose in routine practice received by patients during long time periods. Some previous studies carried out in routine practice have evaluated the cumulative incidence of effective dose by focusing on specific pathologies<sup>4</sup>, population groups<sup>5</sup> or the effect of recurrent CT<sup>6</sup>. However, none of them have evaluated the cumulative radiation exposure derived from all diagnostic procedures carried out in routine practice during a long period of time, for both adults and children. Given that the number of people who have these examinations many times during their lifetime

1  
2  
3 has increased<sup>6</sup>, the detection of patients with high cumulative radiation derived  
4  
5 from recurrent imaging tests will help clinicians to reduce patient-specific  
6  
7 associated cancer risks.  
8  
9

10 The purpose of this study was to quantify the number of all radiological  
11  
12 investigations performed in a cohort of patients in routine practice to calculate  
13  
14 each patient's cumulative radiation exposure and the recurrent tests during a  
15  
16 12-year study period, according to sex and age.  
17  
18  
19  
20  
21  
22  
23  
24  
25  
26  
27  
28  
29  
30  
31  
32  
33  
34  
35  
36  
37  
38  
39  
40  
41  
42  
43  
44  
45  
46  
47  
48  
49  
50  
51  
52  
53  
54  
55  
56  
57  
58  
59  
60

For peer review only

## Methods

### Study design

We conducted a retrospective cohort study to analyse the individual cumulative effective dose in routine practice and the recurrent imaging diagnostic tests.

### Setting

The target population for the study were all residents in the catchment area of San Juan Hospital (Alicante), in the Valencian Community (Spain), a general centre, with a catchment population of 234,424 people. This is a referral hospital for all individuals living in the catchment area who belong to the National Health Care System (NHS). The majority of the Spanish population uses the NHS as the main medical service (the publicly funded insurance scheme covers 98.5% of the Spanish population).

### Participants

We selected the population who belonged to the catchment area of that hospital during the year 2007, and collected all consecutive diagnostic imaging tests undergone by this population until 31<sup>st</sup> December 2018 (in any care setting, inpatient, outpatient, or emergency department). We excluded: imaging tests that did not involve radiation exposure (ie, MRI and ultrasound) and patients who had an imagen test in this hospital but did not belong to its catchment area.

### Sources and variables

We collected the following data from Medical Image Bank of the Valencian Community from the Department of Universal Health and Public Health Service (BIMCV-CSUSP): sex and age at entry in the study, radiological examination



1  
2  
3 and date. Both the images and the patient data were anonymized and de-  
4  
5 identified by the Health Informatics Department of the Hospital of San Juan  
6  
7 using R&D Cloud CEIB Architecture<sup>7</sup> This digital register started in 2007 in our  
8  
9 setting.

10  
11  
12  
13 We also examined the clinical context of patients receiving the highest dose  
14  
15 radiation. We classified patients with diagnosis of neoplasm as patients at high  
16  
17 risk of receiving high doses of radiation, as it was previously done<sup>6</sup>. Thus, for all  
18  
19 patients who underwent an imagen test, we checked if they had the ICD11 code  
20  
21 of neoplasms through the digital register, which started in 1993.  
22  
23

24  
25 We estimated the associated radiation effective dose using previous published  
26  
27 evidence<sup>8</sup>.  
28

29  
30 Patient and public involvement:

31  
32  
33 Patients and the public were not involved in the design, conduct and reporting of  
34  
35 the research.  
36  
37

38  
39 Statistical analysis

40  
41  
42 The average dose values for individual examinations were analysed by a  
43  
44 frequency distribution test. Data were expressed as the median and 25–75  
45  
46 percentiles for non-normally distributed values. Differences were evaluated by  
47  
48 the Mann–Whitney U test. Categorical variables were expressed as  
49  
50 percentages and differences were evaluated by Chi squared test.  
51  
52

53  
54 The statistical analyses of the data were performed with SPSS (Version 25.0;  
55  
56 SPSS Inc, Chicago, IL). A p-value 0.005 was considered significant.  
57  
58  
59  
60

## Results

### *Cohort characteristics*

The cohort included 224,751 people: 53.7% women and 46.3% men. Of these, 154,520 (68.8%) underwent an imaging test associated with radiation during the period of study, with different frequency for men (66.6%) and women (70.6%) ( $p < 0.001$ ) (table 1). Imaging test frequency ranged from 56.5% in the 20 to 30 age group to the highest percentage, 73.1%, in the 60 to 80 year old group.

### *Characteristics of imaging tests undergone during period of study.*

Overall, the population had a total of 1,335,752 imaging tests during the period of study.

The type of imaging tests carried out were: 1,110,077 (83.0%) plain radiography; 156,848 (11.8%) CT; 63,157 (4.8%) fluoroscopy, and 5,670 (0.4%) interventional radiography. Men were more likely to have CT (14.3%) than women (10.1%) and women were more likely to have fluoroscopy (7.1%) than men (1.6) ( $p = 0.035$ ). Moreover, the percentage of people who had a CT increased with age (from 1.2% in the 0 to 5 age group to 15.4% in the 60 to 70 age group (table 2).

### *Recurrent imaging tests.*

The population exposed undergone a median of 5 imaging tests and 52.9% of the patients who had an imaging test during the period of study underwent 5 or more examinations. Women were more likely to have more cumulative imaging tests than men during this period (maximum 221 in men and 633 in women; IQR 2-10 in men and 2-12 in women,  $p < 0.001$ ).

1  
2  
3 Table 3 shows distribution data for per-patient imaging tests (median and  
4  
5 maximum) by age and sex for each type of imaging test.  
6  
7

8  
9 Moreover, 8.2% of the patients who had an imagen test during the period of  
10  
11 study and 25.4% (12,602/49,544) of the patients who had a CT, underwent 5 or  
12  
13 more CTs (5.4% (112/2,063) in the 0 to 15 age group), with a maximum of 75  
14  
15 examinations; 1.8% of the patients who had an imagen test and 9.7%  
16  
17 (2,849/29,314) of the patients who had a fluoroscopy examination, underwent 5  
18  
19 or more fluoroscopy examinations (2.1% (23/1,100) in the 0 to 15 age group),  
20  
21 with a maximum of 18 examinations; 0.2% of the patients who had an imagen  
22  
23 test and 5.8% of the patients who had an interventional radiography, underwent  
24  
25 3 or more interventional radiographies, with a maximum of 10 examinations,  
26  
27 and 21.2% of the patients who had an imagen test and 21.6% (32,778/151,980)  
28  
29 of the patients who had a plain radiography, underwent 10 or more plain  
30  
31 radiographies (10.1% (2,185/21,620) in the 0 to 15 age group), with a maximum  
32  
33 of 559 examinations.  
34  
35  
36  
37

38  
39 Men were more likely to have more than 5 CTS than women (27.8% vs 23.3%,  
40  
41  $p < 0.001$ ), and less likely to have more than 5 fluoroscopy examinations (2.3%  
42  
43 vs 11.6%,  $p < 0.001$ ) and more than 10 plain radiographies than women (19.6%  
44  
45 vs 23.2%,  $p < 0.001$ , respectively) (data not shown).  
46  
47  
48

49 *Cumulative effective dose received during the period of study.*  
50

51  
52 The median total cumulative effective dose including all modalities in all  
53  
54 population exposed was 2.10 mSv (maximum 3980.30). Women received more  
55  
56 effective dose than men (median 2.38 vs median 1.90,  $p < 0.001$ ). The  
57  
58 cumulative incidence of effective dose increased with age: median 0.72  
59  
60

1  
2  
3 (maximum 47.15) in the 0 to 5 age group and median 10.20 (maximum  
4  
5 3980.309) in the 70 to 80 age group ( $p < 0.001$ ) (table 4).  
6  
7

8 A total of 4,844 (3.1%) people received cumulative doses between 50-100 mSv  
9  
10 and 2,298 (1.5%) people received doses greater than 100 mSv. Men were more  
11  
12 likely to have cumulative effective dose above 50 mSv (both between 50 and  
13  
14 100 mSv (3.5%) and higher than 100 mSv (1.8%), than women (2.9% and  
15  
16 1.2%, respectively) ( $p < 0.001$ ). Of the 2,298 patients who received more than  
17  
18 100 mSv during the 12-year study period, 725 (33.3%) were patients in the 60  
19  
20 to 70 age group; 565 (24.6%) were patients in the 50 to 60 age group; 462  
21  
22 (20.1%) were patients in the 70 to 80 age group, and 350 (15.2%) were patients  
23  
24 in the 40 to 50 age group (table 5).  
25  
26  
27

### 28 29 30 *Classification of high-risk patients.*

31  
32 Of the 154,520 patients who had an imagen test during the period of study,  
33  
34 11,072 (7.1%) had a diagnosis of cancer during the period of study. Out of  
35  
36 2,298 patients who received more than 100 mSv, 1,678 (73.0 %) had a  
37  
38 diagnosis of cancer, compared with 43.14% of patients who received between  
39  
40 50 and 100 mSv and 4.9 % of patients who received less than 50 mSv.  
41  
42  
43  
44  
45  
46  
47  
48  
49  
50  
51  
52  
53  
54  
55  
56  
57  
58  
59  
60

## Discussion

This study provides important information on the cumulative radiation dose received by patients in routine practice. We showed that the median total cumulative effective dose during the 12-year study period was 2.10 mSv (maximum 3,980.30), lower than the 100 mSv threshold often considered for significant risks. However, 4,844 (3.1%) people received between 50 and 100 mSv and 2,298 (1.5%) more than 100 mSv during the study period.

According to stochastic effect theory and based on the estimated incidence of fatal cancer from the International Commission of Radiation Protection (ICRP) as well as from the Biological Effects of Ionising Radiation Committee VII (BEIR VII) released in 2005, for an adult, an effective dose of 100 mSv results in a risk of fatal cancer of approximately 1 in 200, and 1 in 100 for combined fatal and non-fatal cancer<sup>9</sup>. In our study, we only showed data from a 12-year period, so, the percentage of patients with an effective dose higher than 100 mSv during their lifetime will be even higher. Moreover, although the BEIR VII report concludes that at doses lower than 100 mSv, the risk of cancer is small<sup>10</sup>, the Radiation Effect Research Foundation (RERF) in Japan, defends a “linear-no-threshold” risk model, where the risk of cancer follows in a linear fashion at lower doses, without a threshold. Smallest dose, therefore, has the potential to cause a small increase in cancer risk<sup>11</sup>.

We also found high rates of recurrent CT (25.4% of the patients who had a CT, underwent 5 or more CTs, with a maximum of 75 examinations). Previous studies have shown higher rates of recurrent CT (33% of patients underwent 5 or more CT examinations)<sup>6</sup>, but they included a longer followed-up period (22 years vs 12 years). Moreover, 5.8% of the patients who had an interventional

1  
2  
3 radiography, underwent 3 or more interventional radiographies during the period  
4  
5 of study, with a maximum of 10 examinations. Both, interventional radiography  
6  
7 and CT, are associated with a relatively high dose of radiation. Plain  
8  
9 radiography and fluoroscopy, although are not associated with so high doses,  
10  
11 also showed a high recurrent rate.  
12  
13

14  
15 Most of our population younger than 15 years old received effective dose lower  
16  
17 than 50 mSv during the period of study; however, more than 40% of this  
18  
19 population underwent 5 or more imaging tests during this period and 5% of  
20  
21 them had 5 or more CTs. Moreover, the maximum number of plain radiography,  
22  
23 CT, fluoroscopy and interventional radiography examinations undergone was  
24  
25 86, 17, 8 and 7, respectively in this age group. Although the linear no-threshold  
26  
27 model is very controversial and is considered of little relevance for doses below  
28  
29 100mSv, we have to take into account that children are more sensitive to  
30  
31 ionizing radiation effects due to their high radiosensitivity<sup>12, 13</sup>. In addition,  
32  
33 previous studies have shown a possible risk of cancer from radiation associated  
34  
35 with commonly used procedures, such as computed tomography scan, in  
36  
37 children at very young ages<sup>14</sup>.  
38  
39  
40  
41  
42

43  
44 As in previous studies<sup>6</sup>, most of the patients who received more than 100 mSv  
45  
46 had history of malignancy. However, 27% of them had no underlying malignant  
47  
48 disease. In both group of patients, clinicians should balance the risk of the  
49  
50 cumulative exposure against the benefit of recurrent imaging.  
51  
52

53  
54 There is increasing international interest in reducing radiation doses from  
55  
56 imaging procedures<sup>15</sup>. However, previous studies showed the difficulties when  
57  
58 implementing initiatives to reduce radiation exposure into clinical practice. For  
59  
60 instance, communication with patients regarding associated risk is essential to

1  
2  
3 get a rational use of diagnostic imaging test, but there is a lack of knowledge in  
4 the general population regarding radiation exposure and the associated risks  
5 related to imaging tests<sup>16</sup>. In addition, recent studies showed that most  
6 clinicians were unaware of radiation exposure associated with imaging tests<sup>17</sup>  
7 and that less than 50% of the imaging tests carried out in clinical practice were  
8 considered appropriate according to the available recommendations and 29.1%  
9 of the total collective effective dose was associated with inappropriate imaging  
10 tests<sup>18</sup>.

11  
12 Assessing the amount of effective dose that patients receive during their  
13 lifetime, as the European Commission of Radiological Protection recommends<sup>6</sup>,  
14 could therefore be considered a useful tool in the reduction of cancer risk in  
15 particular groups of patients to help clinicians to reach a shared decision with  
16 patients when asking for imaging tests. However, a big effort should be done  
17 given the great variation in CT protocols and radiation doses across countries  
18 and related with technical parameters<sup>19</sup>.

19  
20  
21  
22  
23  
24  
25  
26  
27  
28  
29  
30  
31  
32  
33  
34  
35  
36  
37  
38  
39  
40  
41  
42  
43  
44  
45  
46  
47  
48  
49  
50  
51  
52  
53  
54  
55  
56  
57  
58  
59  
60  
61  
62  
63  
64  
65  
66  
67  
68  
69  
70  
71  
72  
73  
74  
75  
76  
77  
78  
79  
80  
81  
82  
83  
84  
85  
86  
87  
88  
89  
90  
91  
92  
93  
94  
95  
96  
97  
98  
99  
100  
101  
102  
103  
104  
105  
106  
107  
108  
109  
110  
111  
112  
113  
114  
115  
116  
117  
118  
119  
120  
121  
122  
123  
124  
125  
126  
127  
128  
129  
130  
131  
132  
133  
134  
135  
136  
137  
138  
139  
140  
141  
142  
143  
144  
145  
146  
147  
148  
149  
150  
151  
152  
153  
154  
155  
156  
157  
158  
159  
160  
161  
162  
163  
164  
165  
166  
167  
168  
169  
170  
171  
172  
173  
174  
175  
176  
177  
178  
179  
180  
181  
182  
183  
184  
185  
186  
187  
188  
189  
190  
191  
192  
193  
194  
195  
196  
197  
198  
199  
200  
201  
202  
203  
204  
205  
206  
207  
208  
209  
210  
211  
212  
213  
214  
215  
216  
217  
218  
219  
220  
221  
222  
223  
224  
225  
226  
227  
228  
229  
230  
231  
232  
233  
234  
235  
236  
237  
238  
239  
240  
241  
242  
243  
244  
245  
246  
247  
248  
249  
250  
251  
252  
253  
254  
255  
256  
257  
258  
259  
260  
261  
262  
263  
264  
265  
266  
267  
268  
269  
270  
271  
272  
273  
274  
275  
276  
277  
278  
279  
280  
281  
282  
283  
284  
285  
286  
287  
288  
289  
290  
291  
292  
293  
294  
295  
296  
297  
298  
299  
300  
301  
302  
303  
304  
305  
306  
307  
308  
309  
310  
311  
312  
313  
314  
315  
316  
317  
318  
319  
320  
321  
322  
323  
324  
325  
326  
327  
328  
329  
330  
331  
332  
333  
334  
335  
336  
337  
338  
339  
340  
341  
342  
343  
344  
345  
346  
347  
348  
349  
350  
351  
352  
353  
354  
355  
356  
357  
358  
359  
360  
361  
362  
363  
364  
365  
366  
367  
368  
369  
370  
371  
372  
373  
374  
375  
376  
377  
378  
379  
380  
381  
382  
383  
384  
385  
386  
387  
388  
389  
390  
391  
392  
393  
394  
395  
396  
397  
398  
399  
400  
401  
402  
403  
404  
405  
406  
407  
408  
409  
410  
411  
412  
413  
414  
415  
416  
417  
418  
419  
420  
421  
422  
423  
424  
425  
426  
427  
428  
429  
430  
431  
432  
433  
434  
435  
436  
437  
438  
439  
440  
441  
442  
443  
444  
445  
446  
447  
448  
449  
450  
451  
452  
453  
454  
455  
456  
457  
458  
459  
460  
461  
462  
463  
464  
465  
466  
467  
468  
469  
470  
471  
472  
473  
474  
475  
476  
477  
478  
479  
480  
481  
482  
483  
484  
485  
486  
487  
488  
489  
490  
491  
492  
493  
494  
495  
496  
497  
498  
499  
500  
501  
502  
503  
504  
505  
506  
507  
508  
509  
510  
511  
512  
513  
514  
515  
516  
517  
518  
519  
520  
521  
522  
523  
524  
525  
526  
527  
528  
529  
530  
531  
532  
533  
534  
535  
536  
537  
538  
539  
540  
541  
542  
543  
544  
545  
546  
547  
548  
549  
550  
551  
552  
553  
554  
555  
556  
557  
558  
559  
560  
561  
562  
563  
564  
565  
566  
567  
568  
569  
570  
571  
572  
573  
574  
575  
576  
577  
578  
579  
580  
581  
582  
583  
584  
585  
586  
587  
588  
589  
590  
591  
592  
593  
594  
595  
596  
597  
598  
599  
600  
601  
602  
603  
604  
605  
606  
607  
608  
609  
610  
611  
612  
613  
614  
615  
616  
617  
618  
619  
620  
621  
622  
623  
624  
625  
626  
627  
628  
629  
630  
631  
632  
633  
634  
635  
636  
637  
638  
639  
640  
641  
642  
643  
644  
645  
646  
647  
648  
649  
650  
651  
652  
653  
654  
655  
656  
657  
658  
659  
660  
661  
662  
663  
664  
665  
666  
667  
668  
669  
670  
671  
672  
673  
674  
675  
676  
677  
678  
679  
680  
681  
682  
683  
684  
685  
686  
687  
688  
689  
690  
691  
692  
693  
694  
695  
696  
697  
698  
699  
700  
701  
702  
703  
704  
705  
706  
707  
708  
709  
710  
711  
712  
713  
714  
715  
716  
717  
718  
719  
720  
721  
722  
723  
724  
725  
726  
727  
728  
729  
730  
731  
732  
733  
734  
735  
736  
737  
738  
739  
740  
741  
742  
743  
744  
745  
746  
747  
748  
749  
750  
751  
752  
753  
754  
755  
756  
757  
758  
759  
760  
761  
762  
763  
764  
765  
766  
767  
768  
769  
770  
771  
772  
773  
774  
775  
776  
777  
778  
779  
780  
781  
782  
783  
784  
785  
786  
787  
788  
789  
790  
791  
792  
793  
794  
795  
796  
797  
798  
799  
800  
801  
802  
803  
804  
805  
806  
807  
808  
809  
810  
811  
812  
813  
814  
815  
816  
817  
818  
819  
820  
821  
822  
823  
824  
825  
826  
827  
828  
829  
830  
831  
832  
833  
834  
835  
836  
837  
838  
839  
840  
841  
842  
843  
844  
845  
846  
847  
848  
849  
850  
851  
852  
853  
854  
855  
856  
857  
858  
859  
860  
861  
862  
863  
864  
865  
866  
867  
868  
869  
870  
871  
872  
873  
874  
875  
876  
877  
878  
879  
880  
881  
882  
883  
884  
885  
886  
887  
888  
889  
890  
891  
892  
893  
894  
895  
896  
897  
898  
899  
900  
901  
902  
903  
904  
905  
906  
907  
908  
909  
910  
911  
912  
913  
914  
915  
916  
917  
918  
919  
920  
921  
922  
923  
924  
925  
926  
927  
928  
929  
930  
931  
932  
933  
934  
935  
936  
937  
938  
939  
940  
941  
942  
943  
944  
945  
946  
947  
948  
949  
950  
951  
952  
953  
954  
955  
956  
957  
958  
959  
960  
961  
962  
963  
964  
965  
966  
967  
968  
969  
970  
971  
972  
973  
974  
975  
976  
977  
978  
979  
980  
981  
982  
983  
984  
985  
986  
987  
988  
989  
990  
991  
992  
993  
994  
995  
996  
997  
998  
999  
1000

Limitations of our study included the retrospective design and lack of information regarding patients who might have been imaged outside the healthcare system, as well as radiation derived from nuclear medicine that also represents an important proportion of the collective population dose<sup>2, 3</sup>. We used the available evidence to estimate the effective dose for each examination, as is proposed by the dosedatamed project<sup>2</sup>. However, this type of estimation has inherent limitations, although it does not affect the overall result. It is also true that our results may differ from those of studies in different settings. Nevertheless, we included a general hospital and its catchment area (with a total population over 200,000 people). Even though our results could

1  
2  
3 have some limited generalisability in other settings, analysing this population  
4 provides important insights, showing as far as we know, the first evaluation of  
5 the cumulative incidence of effective dose in routine practice (including adults  
6 and children) according to age and sex over a 12 year-period.  
7  
8  
9  
10  
11  
12

### 13 **Conclusions**

14  
15  
16 A significant proportion of patients received doses higher than 50 mSv during  
17 the 12-year period of study. Moreover, the rate of recurrent examinations was  
18 high, especially in older patients, but also relevant in the 0 to 15 age group.  
19  
20  
21

22 These data could help clinicians to make an informed decision when asking for  
23 each imaging test, which would lead to lower cumulative lifetime radiation, and  
24 consequently a reduction in associated risks.  
25  
26  
27  
28  
29  
30  
31  
32  
33  
34  
35  
36  
37  
38  
39  
40  
41  
42  
43  
44  
45  
46  
47  
48  
49  
50  
51  
52  
53  
54  
55  
56  
57  
58  
59  
60



1  
2  
3 **Funding statement:** This research received no specific grant from any funding  
4 agency in the public, commercial or not-for-profit sectors.  
5  
6

7  
8 **Competing interest declaration**  
9

10  
11 There are not competing interest to declare.  
12  
13

14 **Contributors:** BL, IGA and JMS conceived of and designed the study. BL and  
15 JMS acquired the data. BL and JMS prepared the data and BL, JMS and IGA  
16 interpreted statistical analyses. BL did the statistical analyses and drafted the  
17 data tables. BL, JMS and IGA co-wrote the manuscript. All authors critically  
18 revised the paper for important intellectual content and approved the final  
19 version.  
20  
21  
22  
23  
24  
25  
26  
27

28 **Ethical approval:** The study was approved by the institutional review board at  
29 San Juan Alicante Hospital (14/301).  
30  
31  
32

33 **Data sharing:** No additional data available.  
34  
35  
36  
37  
38  
39  
40  
41  
42  
43  
44  
45  
46  
47  
48  
49  
50  
51  
52  
53  
54  
55  
56  
57  
58  
59  
60

## Bibliography

1. European Council Directive. 2013/59/Euratom on basic safety standards for protection against the dangers arising from exposure to ionising radiation and repealing Directives 89/618/Euratom, 90/641/Euratom, 96/29/Euratom, 97/43/Euratom and 2003/122/ Euratom. OJ of the EU 2014;L13 57:1–73.
2. European Commission on Radiological Protection Publication 154, 2008. European Guidance on Estimating Population Doses from Medical X- Ray Procedures. Available from:  
[http://ddmed.eu/\\_media/background\\_of\\_ddm1:rp154.pdf](http://ddmed.eu/_media/background_of_ddm1:rp154.pdf).
3. European Commission on Radiological Protection Publication 180, 2014. Diagnostic Reference Levels in Thirty-Six European Countries. Available from:  
<https://ec.europa.eu/energy/sites/ener/files/documents/RP180.pdf>.
4. Guttikonda R, Herts BR, Dong F, Baker ME, Fenner KB, Pohlman B. Estimated radiation exposure and cancer risk from CT and PET/CT scans in patients with lymphoma. *Eur J Radiol* 2014;83:1011-1015.  
doi:10.1016/j.ejrad.2014.02.015 pmid: 24656401.
5. Law M, Ma WK, Chan E et al. Evaluation of cumulative effective dose and cancer risk from repetitive full spine imaging using EOS system: Impact to adolescent patients of different populations. *Eur J Radiol* 2017;96:1-5.  
doi:10.1016/j.ejrad.2017.09.006 pmid: 29103466.
6. Sodickson A, Baeyens PF, Andriole KP et al. Recurrent CT, cumulative radiation exposure, and associated radiation-induced cancer risks from CT of adults. *Radiology* 2009;251:175-84. doi:10.1148/radiol.2511081296 pmid: 19332852.

- 1  
2  
3 7. Salinas JM, de la Iglesia-Vaya M, Bonmati LM, Valenzuela R, Cazorla M. R &  
4  
5 D Cloud CEIB: Management System and Knowledge Extraction for Bioimaging  
6  
7 in the Cloud. *Distributed Computing and Artificial Intelligence* 2012: 331-338.  
8  
9 doi: 10.1007/978-3-642-28765-7\_39.  
10  
11
- 12  
13 8. Vilar-Palop J, Vilar J, Hernández-Aguado I, et al. Updated effective  
14  
15 doses in radiology. *J Radiol Prot* 2016;36:975–90. doi: 10.1088/0952-  
16  
17 4746/36/4/975 pmid: 27893456.  
18  
19
- 20  
21 9. Committee to Assess Health Risks from Exposure to Low levels of  
22  
23 Ionizing Radiation; Nuclear and Radiation Studies Board, Division on Earth and  
24  
25 Life Studies, National Research Council of the National Academies. Health  
26  
27 Risks From Exposure to Low Levels of Ionizing Radiation: BEIR VII Phase 2.  
28  
29 Washington, DC: The National Academies Press; 2006.  
30  
31
- 32  
33 10. National Research Council. Health risks from exposure to low levels of  
34  
35 ionizing radiation: BEIR VII phase 2. Washington, DC: The National Academies  
36  
37 Press; 2006.  
38  
39
- 40  
41 11. Grant EJ, Brenner A, Sugiyama H et al. Solid Cancer Incidence among  
42  
43 the Life Span Study of Atomic Bomb Survivors: 1958-2009. *Radiat Res*  
44  
45 2017;187:513-537. doi: 10.1667/RR14492.1 pmid: 28319463.  
46  
47
- 48  
49 12. Mathews JD, Forsythe AV, Brady Z et al. Cancer risk in 680,000 people  
50  
51 exposed to computed tomography scans in childhood or adolescence: data  
52  
53 linkage study of 11 million Australians. *BMJ* 2013;346:f2360. doi:  
54  
55 10.1136/bmj.f2360.13 pmid: 23694687.  
56  
57  
58  
59  
60

- 1  
2  
3 13. Meulepas JM, Ronckers CM, Smets AMJB et al. Radiation exposure from  
4 pediatric CT scans and subsequent cancer risk in the Netherlands. *J Natl*  
5 *Cancer Inst* 2019;111:256-263. doi: 10.1093/jnci/djy104 pmid: 30020493.  
6  
7  
8  
9  
10  
11 14. Rajaraman P, Simpson J, Neta G et al. Early life exposure to diagnostic  
12 radiation and ultrasound scans and risk of childhood cancer: case-control study.  
13 *BMJ* 2011;342:d472. doi: 10.1136/bmj.d472 pmid: 21310791.  
14  
15  
16  
17  
18 15. Amis ES Jr, Butler PF; American College of Radiology. ACR white paper  
19 on radiation dose in medicine: three years later. *J Am Coll Radiol* 2010;7:865-  
20 70. doi: 10.1016/j.jacr.2010.04.006 pmid: 21040868.  
21  
22  
23  
24  
25  
26 16. Lumbreras B, Vilar J, González-Álvarez I et al. Avoiding fears and  
27 promoting shared decision-making: How should physicians inform patients  
28 about radiation exposure from imaging tests? *PLoS One* 2017;12:e0180592.  
29 doi: 10.1371/journal.pone.0180592 pmid: 28686656.  
30  
31  
32  
33  
34  
35  
36 17. Lumbreras B, Vilar J, González-Álvarez I, Guilabert M, Parker LA,  
37 Pastor-Valero M et al. Evaluation of clinicians' knowledge and practices  
38 regarding medical radiological exposure: findings from a mixed-methods  
39 investigation (survey and qualitative study). *BMJ Open* 2016;6:e012361. doi:  
40 10.1136/bmjopen-2016-012361 pmid: 27799242.  
41  
42  
43  
44  
45  
46  
47  
48 18. Vilar-Palop J, Hernandez-Aguado I, Pastor-Valero M, Vilar J, González-  
49 Álvarez I, Lumbreras B. Appropriate use of medical imaging in two Spanish  
50 public hospitals: a cross-sectional analysis. *BMJ Open* 2018;8:e019535. doi:  
51 10.1136/bmjopen-2017-019535 pmid: 29549204.  
52  
53  
54  
55  
56  
57  
58  
59  
60

1  
2  
3 19. Smith-Bindman R, Wang Y, Chu P et al. International variation in  
4 radiation dose for computed tomography examinations: prospective cohort  
5 study. *BMJ* 2019;364:k4931. doi: 10.1136/bmj.k4931 pmid: 30602590.  
6  
7  
8  
9  
10  
11  
12  
13  
14  
15  
16  
17  
18  
19  
20  
21  
22  
23  
24  
25  
26  
27  
28  
29  
30  
31  
32  
33  
34  
35  
36  
37  
38  
39  
40  
41  
42  
43  
44  
45  
46  
47  
48  
49  
50  
51  
52  
53  
54  
55  
56  
57  
58  
59  
60

For peer review only

**1. Characteristics of study population by final exposure status\*, based on 12-year period of study (2007-2018).**

| <b>Characteristics</b>               | <b>No (%) of people exposed</b> | <b>Total no of people in study</b> |
|--------------------------------------|---------------------------------|------------------------------------|
| <b>Sex</b>                           |                                 |                                    |
| <b>Men</b>                           | 69,265 (66.6)                   | 104,056                            |
| <b>Women</b>                         | 85255 (70.6)                    | 120,695                            |
| <b>Age at entry to study (years)</b> |                                 |                                    |
| <b>0-5</b>                           | 7,631 (62.4)                    | 12,224                             |
| <b>5-10</b>                          | 7,185 (60.1)                    | 11,965                             |
| <b>10-15</b>                         | 6,978 (62.1)                    | 11,23                              |
| <b>15-20</b>                         | 6,834 (59.3)                    | 11,526                             |
| <b>20-30</b>                         | 17,590 (56.5)                   | 31,142                             |
| <b>30-40</b>                         | 27,609 (66.9)                   | 41,287                             |
| <b>40-50</b>                         | 24,364 (70.4)                   | 34,625                             |
| <b>50-60</b>                         | 18,783 (70.4)                   | 26,671                             |
| <b>60-70</b>                         | 16,093 (73.1)                   | 22,028                             |
| <b>70-80</b>                         | 14,052 (73.1)                   | 19,225                             |
| <b>&gt;80</b>                        | 7,401 (70.3)                    | 10,523                             |
| <b>Total no of people in study</b>   | <b>154,520 (68.8)</b>           | <b>224,751</b>                     |

\*Exposure status at end of study. All study members were classified as unexposed on entry to the study.

1  
2  
3  
4  
5  
6  
7  
8  
9  
10  
11  
12  
13  
14  
15  
16  
17  
18  
19  
20  
21  
22  
23  
24  
25  
26  
27  
28  
29  
30  
31  
32  
33  
34  
35  
36  
37  
38  
39  
40  
41  
42  
43  
44  
45  
46  
47  
48  
49  
50  
51  
52  
53  
54  
55  
56  
57  
58  
59  
60

For peer review only

## 2- Characteristics of the imagen tests received by sex and age during the period of study.

| Characteristics                      | Plain radiography | Computed tomography | Fluoroscopy  | Interventional radiography | Total   |
|--------------------------------------|-------------------|---------------------|--------------|----------------------------|---------|
| <b>Sex</b>                           |                   |                     |              |                            |         |
| <b>Men</b>                           | 467,373 (83.5)    | 79,796 (14.3)       | 9,159 (1.6)  | 3,288 (0.6)                | 559,616 |
| <b>Women</b>                         | 631,917 (82.6)    | 77,052 (10.1)       | 53,998 (7.1) | 2,382 (0.3)                | 765,349 |
| <b>Age at entry to study (years)</b> |                   |                     |              |                            |         |
| <b>0-5</b>                           | 33,570 (97.2)     | 423 (1.2)           | 541 (1.6)    | 4                          | 34,538  |
| <b>5-10</b>                          | 36,427 (95.5)     | 1,050 (2.8)         | 648 (1.7)    | 14                         | 38,138  |
| <b>10-15</b>                         | 35,333 (93.8)     | 1,703 (4.5)         | 610 (1.6)    | 33 (0.1)                   | 37,679  |
| <b>15-20</b>                         | 32,274 (92.9)     | 1,850 (5.3)         | 570 (1.6)    | 38 (0.1)                   | 34,732  |
| <b>20-30</b>                         | 78,990 (90.3)     | 6,285 (7.2)         | 2,078 (2.4)  | 127 (0.1)                  | 87,480  |
| <b>30-40</b>                         | 131,846 (88.1)    | 13,201 (8.8)        | 4,304 (2.9)  | 327 (0.2)                  | 149,678 |
| <b>40-50</b>                         | 153,479 (80.8)    | 22,609 (11.9)       | 13,093 (6.9) | 609 (0.3)                  | 189,790 |
| <b>50-60</b>                         | 166,589 (76.6)    | 30,630 (14.1)       | 19,081 (8.8) | 1,073 (0.5)                | 217,373 |



1  
2  
3  
4  
5  
6  
7  
8  
9  
10  
11  
12  
13  
14  
15  
16  
17  
18  
19  
20  
21  
22  
23  
24  
25  
26  
27  
28  
29  
30  
31  
32  
33  
34  
35  
36  
37  
38  
39  
40  
41  
42  
43  
44  
45  
46

|                    |                         |                       |                     |                    |                  |
|--------------------|-------------------------|-----------------------|---------------------|--------------------|------------------|
| <b>60-70</b>       | 184,943 (77.9)          | 36,428 (15.4)         | 14,365 (6.1)        | 1,563 (0.7)        | 237,299          |
| <b>70-80</b>       | 177,888 (91.4)          | 32,227 (14.8)         | 6,929 (3.2)         | 1,509 (0.7)        | 218,553          |
| <b>&gt;80</b>      | 69,738 (85.6)           | 10,442 (12.8)         | 938 (1.2)           | 373 (0.5)          | 81,491           |
| <b>Total (n/%)</b> | <b>1,110,077 (83.0)</b> | <b>156,848 (11.8)</b> | <b>63,157 (4.8)</b> | <b>5,670 (0.4)</b> | <b>1,335,752</b> |

For peer review only

**3- Summary data for the distribution for per-patient cumulative diagnostic imaging tests counts by sex and age during the period of study (2007-2018).**

| Characteristics                      | Plain radiography |         | Computed tomography |         | Fluoroscopy |         | Interventional radiography |         |
|--------------------------------------|-------------------|---------|---------------------|---------|-------------|---------|----------------------------|---------|
|                                      | Median            | Maximum | Median              | Maximum | Median      | Maximum | Median                     | Maximum |
| <b>Sex</b>                           |                   |         |                     |         |             |         |                            |         |
| <b>Men</b>                           | 4                 | 213     | 2                   | 71      | 1           | 18      | 1                          | 10      |
| <b>Women</b>                         | 4                 | 559     | 2                   | 75      | 2           | 14      | 1                          | 9       |
| <b>Age at entry to study (years)</b> |                   |         |                     |         |             |         |                            |         |
| <b>0-5</b>                           | 3                 | 41      | 1                   | 5       | 1           | 8       | 1                          | 1       |
| <b>5-10</b>                          | 4                 | 86      | 1                   | 17      | 2           | 8       | 1                          | 2       |
| <b>10-15</b>                         | 4                 | 72      | 1                   | 11      | 1           | 8       | 1                          | 7       |
| <b>15-20</b>                         | 3                 | 64      | 1                   | 14      | 1           | 6       | 1                          | 2       |
| <b>20-30</b>                         | 3                 | 165     | 1                   | 36      | 1           | 7       | 1                          | 9       |
| <b>30-40</b>                         | 3                 | 112     | 1                   | 39      | 1           | 10      | 1                          | 4       |
| <b>40-50</b>                         | 4                 | 373     | 2                   | 57      | 2           | 13      | 1                          | 6       |
| <b>50-60</b>                         | 6                 | 160     | 2                   | 62      | 2           | 18      | 1                          | 7       |
| <b>60-70</b>                         | 8                 | 213     | 2                   | 75      | 2           | 14      | 1                          | 9       |
| <b>70-80</b>                         | 9                 | 139     | 2                   | 69      | 1           | 11      | 1                          | 10      |
| <b>&gt;80</b>                        | 7                 | 101     | 2                   | 35      | 1           | 8       | 1                          | 5       |

4. Cumulative incidence of effective dose (mSv) per person exposed during the period of study.

| Characteristics                      | Median | Percentil 25 | Percentil 75 | Percentil 95 | Maximum |
|--------------------------------------|--------|--------------|--------------|--------------|---------|
| <b>Sex</b>                           |        |              |              |              |         |
| <b>Men</b>                           | 1.90   | 0.2          | 10.20        | 51.74        | 629.58  |
| <b>Women</b>                         | 2.38   | 0.38         | 10.10        | 43.80        | 3980.30 |
| <b>Age at entry to study (years)</b> |        |              |              |              |         |
| <b>0-5</b>                           | 0.21   | 0.06         | 1.60         | 7.66         | 47.15   |
| <b>5-10</b>                          | 0.48   | 0.03         | 2.38         | 10.02        | 94.58   |
| <b>10-15</b>                         | 0.67   | 0.06         | 2.64         | 13.10        | 196.16  |
| <b>15-20</b>                         | 0.74   | 0.10         | 2.98         | 14.66        | 159.51  |
| <b>20-30</b>                         | 1.00   | 0.11         | 4.02         | 18.65        | 222.27  |
| <b>30-40</b>                         | 1.23   | 0.38         | 5.75         | 25.98        | 297.14  |
| <b>40-50</b>                         | 2.00   | 0.38         | 10.12        | 44.22        | 716.16  |
| <b>50-60</b>                         | 4.27   | 0.64         | 17.08        | 73.34        | 629.58  |
| <b>60-70</b>                         | 8.35   | 1.47         | 25.72        | 93.60        | 506.08  |

|               |             |             |              |              |                |
|---------------|-------------|-------------|--------------|--------------|----------------|
| <b>70-80</b>  | 10.20       | 2.40        | 26.00        | 80.17        | 3980.30        |
| <b>&gt;80</b> | 5.30        | 1.19        | 15.96        | 45.14        | 204.32         |
| <b>Total</b>  | <b>2.10</b> | <b>0.36</b> | <b>10.15</b> | <b>47.22</b> | <b>3980.30</b> |

For peer review only

5. Classification of population according to the cumulative incidence of effective dose during the period of study.

| Characteristics                      | 0-50 mSv      | >50-100 mSv | >100 mSv    | p valor |
|--------------------------------------|---------------|-------------|-------------|---------|
| <b>Sex</b>                           |               |             |             | <0.001  |
| <b>Men</b>                           | 65,623 (94.7) | 2,407 (3.5) | 1,235 (1.8) |         |
| <b>Women</b>                         | 81,756 (95.9) | 2,437 (2.9) | 1,063 (1.2) |         |
| <b>Age at entry to study (years)</b> |               |             |             | <0.001  |
| <b>0-5</b>                           | 7,631 (100.0) |             |             |         |
| <b>5-10</b>                          | 7,179 (99.9)  | 6 (0.1)     |             |         |
| <b>10-15</b>                         | 6,953 (99.6)  | 21 (0.3)    | 4 (0.3)     |         |
| <b>15-20</b>                         | 6,814 (99.7)  | 17 (0.2)    | 3 (0.1)     |         |
| <b>20-30</b>                         | 17,450 (99.2) | 97 (0.6)    | 43 (0.2)    |         |
| <b>30-40</b>                         | 27,145 (98.3) | 353 (1.3)   | 111 (0.4)   |         |
| <b>40-50</b>                         | 23,358 (95.9) | 656 (2.7)   | 350 (1.4)   |         |
| <b>50-60</b>                         | 17,201 (91.6) | 1,017 (5.4) | 565 (3.0)   |         |
| <b>60-70</b>                         | 14,045 (87.3) | 1,323 (8.2) | 725 (4.5)   |         |

|               |                       |                    |                    |  |
|---------------|-----------------------|--------------------|--------------------|--|
| <b>70-80</b>  | 12,490 (88.9)         | 1,101 (7.8)        | 462 (3.3)          |  |
| <b>&gt;80</b> | 7,113 (96.1)          | 253 (3.4)          | 35 (0.5)           |  |
| <b>Total</b>  | <b>147,379 (95.4)</b> | <b>4,844 (3.1)</b> | <b>2,298 (1.5)</b> |  |

For peer review only

## STROBE Statement—checklist of items that should be included in reports of observational studies

|                      |                          | Item No | Recommendation                                                                                                                                                                       |
|----------------------|--------------------------|---------|--------------------------------------------------------------------------------------------------------------------------------------------------------------------------------------|
| YES<br>Pages 1 and 3 | Title and abstract       | 1       | (a) Indicate the study's design with a commonly used term in the title or the abstract                                                                                               |
|                      |                          |         | (b) Provide in the abstract an informative and balanced summary of what was done and what was found                                                                                  |
|                      | <b>Introduction</b>      |         |                                                                                                                                                                                      |
| YES Pages 5-6        | Background/rationale     | 2       | Explain the scientific background and rationale for the investigation being reported                                                                                                 |
| YES Page 6           | Objectives               | 3       | State specific objectives, including any prespecified hypotheses                                                                                                                     |
|                      | <b>Methods</b>           |         |                                                                                                                                                                                      |
| YES Page 7           | Study design             | 4       | Present key elements of study design early in the paper                                                                                                                              |
| YES Page 7           | Setting                  | 5       | Describe the setting, locations, and relevant dates, including periods of recruitment, exposure, follow-up, and data collection                                                      |
| YES page 7           | Participants             | 6       | <i>Cross-sectional study</i> —Give the eligibility criteria, and the sources and methods of selection of participants                                                                |
| YES Pages 7-8        | Variables                | 7       | Clearly define all outcomes, exposures, predictors, potential confounders, and effect modifiers. Give diagnostic criteria, if applicable                                             |
| YES Pages 7-8        | Data sources/measurement | 8*      | For each variable of interest, give sources of data and details of methods of assessment (measurement). Describe comparability of assessment methods if there is more than one group |
| YES Page 8           | Bias                     | 9       | Describe any efforts to address potential sources of bias                                                                                                                            |
| NA                   | Study size               | 10      | Explain how the study size was arrived at                                                                                                                                            |
| YES Page 8           | Quantitative variables   | 11      | Explain how quantitative variables were handled in the analyses. If applicable, describe which groupings were chosen and why                                                         |
| YES Page 8           | Statistical methods      | 12      | (a) Describe all statistical methods, including those used to control for confounding                                                                                                |
|                      |                          |         | (b) Describe any methods used to examine subgroups and interactions                                                                                                                  |
|                      |                          |         | (c) Explain how missing data were addressed                                                                                                                                          |
|                      |                          |         | <i>Cross-sectional study</i> —If applicable, describe analytical methods taking account of sampling strategy                                                                         |
|                      |                          |         | (e) Describe any sensitivity analyses                                                                                                                                                |

Continued on next page

| <b>Results</b>                   |                  |     |                                                                                                                                                                                                              |
|----------------------------------|------------------|-----|--------------------------------------------------------------------------------------------------------------------------------------------------------------------------------------------------------------|
| <b>YES</b><br><b>Page 9</b>      | Participants     | 13* | (a) Report numbers of individuals at each stage of study—eg numbers potentially eligible, examined for eligibility, confirmed eligible, included in the study, completing follow-up, and analysed            |
|                                  |                  |     | (b) Give reasons for non-participation at each stage                                                                                                                                                         |
|                                  |                  |     | (c) Consider use of a flow diagram                                                                                                                                                                           |
| <b>YES</b><br><b>Page 9</b>      | Descriptive data | 14* | (a) Give characteristics of study participants (eg demographic, clinical, social) and information on exposures and potential confounders                                                                     |
|                                  |                  |     | (b) Indicate number of participants with missing data for each variable of interest                                                                                                                          |
|                                  |                  |     | (c) <i>Cohort study</i> —Summarise follow-up time (eg, average and total amount)                                                                                                                             |
| <b>YES</b><br><b>Page 9-11</b>   | Outcome data     | 15* | <i>Cohort study</i> —Report numbers of outcome events or summary measures over time                                                                                                                          |
|                                  |                  |     | <i>Case-control study</i> —Report numbers in each exposure category, or summary measures of exposure                                                                                                         |
|                                  |                  |     | <i>Cross-sectional study</i> —Report numbers of outcome events or summary measures                                                                                                                           |
| <b>YES</b><br><b>Page 9-11</b>   | Main results     | 16  | (a) Give unadjusted estimates and, if applicable, confounder-adjusted estimates and their precision (eg, 95% confidence interval). Make clear which confounders were adjusted for and why they were included |
|                                  |                  |     | (b) Report category boundaries when continuous variables were categorized                                                                                                                                    |
|                                  |                  |     | (c) If relevant, consider translating estimates of relative risk into absolute risk for a meaningful time period                                                                                             |
| <b>NA</b>                        | Other analyses   | 17  | Report other analyses done—eg analyses of subgroups and interactions, and sensitivity analyses                                                                                                               |
| <b>Discussion</b>                |                  |     |                                                                                                                                                                                                              |
| <b>YES</b><br><b>Page 12</b>     | Key results      | 18  | Summarise key results with reference to study objectives                                                                                                                                                     |
| <b>YES</b><br><b>Page 14</b>     | Limitations      | 19  | Discuss limitations of the study, taking into account sources of potential bias or imprecision. Discuss both direction and magnitude of any potential bias                                                   |
| <b>YES</b><br><b>Pages 12-13</b> | Interpretation   | 20  | Give a cautious overall interpretation of results considering objectives, limitations, multiplicity of analyses, results from similar studies, and other relevant evidence                                   |
| <b>YES</b><br><b>Page 15</b>     | Generalisability | 21  | Discuss the generalisability (external validity) of the study results                                                                                                                                        |
| <b>Other information</b>         |                  |     |                                                                                                                                                                                                              |
| <b>NA</b>                        | Funding          | 22  | Give the source of funding and the role of the funders for the present study and, if applicable, for the original study on which the present article is based                                                |

\*Give information separately for cases and controls in case-control studies and, if applicable, for exposed and unexposed groups in cohort and cross-sectional studies.

**Note:** An Explanation and Elaboration article discusses each checklist item and gives methodological background and published examples of transparent reporting. The STROBE checklist is best used in conjunction with this article (freely available on the Web sites of PLoS Medicine at <http://www.plosmedicine.org/>, Annals of Internal Medicine at <http://www.annals.org/>, and Epidemiology at <http://www.epidem.com/>). Information on the STROBE Initiative is available at [www.strobe-statement.org](http://www.strobe-statement.org).



# BMJ Open

## Cumulative exposure to ionizing radiation from diagnostic imaging tests: a 12-year follow-up population-based analysis in Spain.

|                                 |                                                                                                                                                                                                                                      |
|---------------------------------|--------------------------------------------------------------------------------------------------------------------------------------------------------------------------------------------------------------------------------------|
| Journal:                        | <i>BMJ Open</i>                                                                                                                                                                                                                      |
| Manuscript ID                   | bmjopen-2019-030905.R1                                                                                                                                                                                                               |
| Article Type:                   | Research                                                                                                                                                                                                                             |
| Date Submitted by the Author:   | 22-Jul-2019                                                                                                                                                                                                                          |
| Complete List of Authors:       | Lumbreras Lacarra, Blanca; Miguel Hernandez University of Elche, Salinas, Josee María; Information Technology Department, San Juan Hospital, Spain<br>Gonzalez-Alvarez, Isabel; Radiodiagnostic Department, San Juan Hospital, Spain |
| <b>Primary Subject Heading</b>: | Radiology and imaging                                                                                                                                                                                                                |
| Secondary Subject Heading:      | Public health                                                                                                                                                                                                                        |
| Keywords:                       | RADIOLOGY & IMAGING, EPIDEMIOLOGY, PREVENTIVE MEDICINE                                                                                                                                                                               |
|                                 |                                                                                                                                                                                                                                      |

SCHOLARONE™  
Manuscripts

1  
2  
3  
4  
5  
6  
7  
8  
9  
10  
11  
12  
13  
14  
15  
16  
17  
18  
19  
20  
21  
22  
23  
24  
25  
26  
27  
28  
29  
30  
31  
32  
33  
34  
35  
36  
37  
38  
39  
40  
41  
42  
43  
44  
45  
46  
47  
48  
49  
50  
51  
52  
53  
54  
55  
56  
57  
58  
59  
60

1 **Title: Cumulative exposure to ionizing radiation from diagnostic imaging**  
2 **tests: a 12-year follow-up population-based analysis in Spain.**

3 **Authors: Lumbreras B\*, Salinas JM, González-Álvarez I.**

4

5

6 - Blanca Lumbreras (\*) Corresponding author:  
7 Department of Public Health, History of Science and Gynecology, Miguel  
8 Hernández University, and CIBER en Epidemiología y Salud Pública.  
9 Crtra Alicante-Valencia km 81. Sant Joan d'Alacant, 03550, Alicante,  
10 Spain.

11 Phone number: +34965919510

12 Email: [blumbreras@goumh.umh.es](mailto:blumbreras@goumh.umh.es)

13 ORCID: 0000-0003-1665-0860

14 - Josee María Salinas

15 Information Technology Department, San Juan Hospital, Spain

16 Email: [salinas\\_josser@gva.es](mailto:salinas_josser@gva.es).

17 - Isabel González-Álvarez

18 Radiodiagnostic Department, San Juan Hospital, Spain

19 Email: [gonzalez\\_isa@gva.es](mailto:gonzalez_isa@gva.es)

20

21

22

23

1  
2  
3 **24 Abstract**  
4  
5

6 **25 Objectives:** To calculate each patient's cumulative radiation exposure and the  
7  
8 26 recurrent tests during a 12-year study period, according to sex and age, in  
9  
10  
11 27 routine practice.  
12

13  
14 **28 Design:** Retrospective cohort study.  
15

16  
17 **29 Setting:** A general hospital with a catchment population of 224,751 people, in  
18  
19 30 the Southeast of Spain.  
20

21  
22 **31 Participants:** Population belonged to the catchment area of that hospital in  
23  
24 32 2007. We collected all consecutive diagnostic imaging tests undergone by this  
25  
26 33 population until 31st December 2018. We excluded: imaging tests that did not  
27  
28 34 involve radiation exposure.  
29

30  
31 **35 Main outcome measures:** The cumulative effective dose and the recurrent  
32  
33 36 imaging tests by sex and age at entry of study.  
34  
35

36  
37 **37 Results:** Of the 224,751 people, 154,520 (68.8%) underwent an imaging test.  
38  
39 38 The population had 1,335,752 imaging tests during the period of study:  
40  
41 39 1,110,077 (83.0%) plain radiography; 156,848 (11.8%) computed tomography  
42  
43 40 (CT); 63,157 (4.8%) fluoroscopy, and 5,670 (0.4%) interventional radiography.  
44  
45 41 25.4% of the patients who had a CT, underwent 5 or more CTs (5.4% in the 0 to  
46  
47 42 20 age group). The median total cumulative effective dose was 2.10 mSv  
48  
49 43 (maximum 3980.30) and 16.30 mSv (maximum 1419.30 mSv) if we considered  
50  
51 44 only doses associated with CT. Women received more effective dose than men  
52  
53 45 (median 2.38 vs median 1.90,  $p < 0.001$ ). A total of 7142 (4.6%) patients  
54  
55 46 received more than 50 mSv, with differences in men and women ( $p < 0.001$ ) and  
56  
57  
58  
59  
60

1  
2  
3 47 2.5% of the patients in the 0 to 20 age group, if we considered only doses  
4  
5 48 associated with CT.  
6  
7

8 49 **Conclusions:** Nearly 5% of patients received doses higher than 50 mSv during  
9  
10 50 the 12-year period of study and 2.5% of the patients in the 0 to 20 age group, if  
11  
12 51 we considered only doses associated with CT. The rate of recurrent  
13  
14 52 examinations was high, especially in older patients, but also relevant in the 0 to  
15  
16 53 20 age group.  
17  
18  
19

20 54  
21  
22 55 **Article summary section: Strengths and limitations of this study.**  
23

- 24  
25 56 - This study follows the Basic Safety Standards Directive adopted by the  
26  
27 57 European Union (EU) in 2013 in order to assess the amount of effective  
28  
29 58 dose that patients receive during their lifetime.  
30  
31 59 - The analysis of medical records allowed us to evaluate all imaging tests  
32  
33 60 performed in a cohort of 224,751 patients in routine practice during a 12-  
34  
35 61 year study period, according to sex and age.  
36  
37 62 - The retrospective design did not allow a detailed assessment of the  
38  
39 63 longitudinal nature of the exposure.  
40  
41 64 - Instead of recording the effective dose for each individual examination,  
42  
43 65 we used the available evidence, as is proposed by the Dosedatamed  
44  
45 66 project.  
46  
47 67 - The inclusion of a general hospital and its catchment area could have led  
48  
49 68 to some limited generalisability in other settings.  
50  
51  
52  
53  
54  
55  
56  
57  
58  
59  
60

## 71 Introduction

72 The use of ionising radiation in medicine provides valuable diagnostic  
73 information that undoubtedly benefits many patients. However, this radiation is  
74 also the greatest source of artificial radiation exposure<sup>1</sup>.

75 In the last decades, there has been an increase in utilization of X-rays,  
76 particularly of Computerized Tomography (CT). Although a single CT scan does  
77 not present a significant risk for patients' health, each additional scan increases  
78 the potential for cancer-inducing biological damage<sup>2</sup> and patients may receive  
79 multiple CT scans over time<sup>3</sup>.

80 According to stochastic effect theory and based on the estimated incidence of  
81 fatal cancer from the International Commission of Radiation Protection (ICRP),  
82 as well as from the Biological Effects of Ionising Radiation Committee VII (BEIR  
83 VII), an effective dose of 100 mSv results in a risk of fatal cancer of  
84 approximately 1 in 200 in adults, and 1 in 100 for combined fatal and non-fatal  
85 cancer<sup>4</sup>. Moreover, although the BEIR VII report concludes that at doses lower  
86 than 100 mSv, the risk of cancer is small<sup>5</sup>, the Radiation Effect Research  
87 Foundation (RERF) in Japan, defends a "linear-no-threshold" risk model, where  
88 the risk of cancer follows in a linear fashion at lower doses, without a threshold.  
89 Smaller doses, therefore, have the potential to cause a small increase in cancer  
90 risk<sup>6</sup>.

91 A recent study in France<sup>7</sup> estimated that 0.7% of all new cancer cases in 2015  
92 were attributable to medical ionizing radiation. In Spain, a rate of 10.9 scans per  
93 1000 children and young adults (0 to 20 years old) was estimated in 2013, and

1  
2  
3 94 a total of 168.6 cancer cases (95% CI: 30.1–421.1) will be attributable to these  
4  
5 95 CTs<sup>8</sup>.

6  
7  
8 96 Concern regarding the effects of ionizing radiation from these medical tests on  
9  
10 97 population health and the estimated increased risk of cancer for the population  
11  
12 98 in general, and for children and young adults in particular (0-20 years old)<sup>9, 10</sup>  
13  
14 99 has led to several initiatives to reduce the use of ionizing radiation.

15  
16  
17  
18 100 The Basic Safety Standards Directive was adopted by the European Union (EU)  
19  
20 101 in 2013<sup>11</sup> to be transposed into national law by 6 February 2018. One key and  
21  
22 102 innovative surveillance mechanism in this revised directive is to record the  
23  
24 103 radiation dose received by each patient undergoing a medical imaging test. The  
25  
26 104 directive mainly focuses on CT and tests involving interventional radiology, all of  
27  
28 105 which are associated with a relatively high dose of radiation. Other diagnostic  
29  
30 106 tests such as conventional radiography, however, are also frequently repeated  
31  
32 107 in patients during their lives with a potential impact on health and could be  
33  
34 108 included in these evaluations. However, these evaluations have not still been  
35  
36 109 developed in the European countries as a systematically procedure.

37  
38  
39  
40  
41  
42 110 A full evaluation of the radiation exposure from all medical diagnostic tests in  
43  
44 111 Europe has been previously carried out in the project Dose DataMed I<sup>12</sup> and  
45  
46 112 II<sup>13</sup>. This project, based on national surveys, includes information on 36  
47  
48 113 European countries regarding population frequencies and radiation dose of x-  
49  
50 114 ray and nuclear medicine radiodiagnostic tests. Although this project has led to  
51  
52 115 a significant advance in the evaluation of population doses, we still do not have  
53  
54 116 data regarding the cumulative dose in routine practice received by patients  
55  
56 117 during long time periods. Some previous studies carried out in routine practice  
57  
58  
59  
60

1  
2  
3 118 have evaluated the cumulative effective dose by focusing on specific  
4  
5 119 pathologies<sup>14</sup>, population groups<sup>15</sup> or the effect of recurrent CT<sup>16</sup>. The  
6  
7 120 previously mentioned study in France<sup>7</sup>, assessed the cumulative exposure in  
8  
9 121 adults of 30 years of age and older, using 2007 national frequencies of imaging  
10  
11 122 tests and adjusted for changes in the use of these tests over time. However,  
12  
13 123 none of them have evaluated the cumulative radiation exposure derived from all  
14  
15 124 diagnostic tests carried out in routine practice during a long period of time, for  
16  
17 125 both adults and children.  
18  
19  
20  
21

22 126 Given that the number of people who have these examinations many times  
23  
24 127 during their lifetime has increased<sup>16</sup>, the detection of patients with high  
25  
26 128 cumulative radiation derived from recurrent imaging tests will help clinicians to  
27  
28 129 reduce patient-specific associated cancer risks. Moreover, the identification of  
29  
30 130 the clinical context of patients with high cumulative radiation doses due to  
31  
32 131 repeat imaging could help clinicians to reduce the use of ionizing radiation<sup>17</sup>.  
33  
34 132 According to previous literature, patients with a diagnosis of neoplasm are  
35  
36 133 prone to have recurrent imaging tests<sup>16</sup>.  
37  
38  
39  
40

41 134 The purpose of this study was to quantify the number of all radiological  
42  
43 135 investigations performed in a cohort of patients in routine practice to calculate  
44  
45 136 each patient's cumulative radiation exposure and the recurrent tests during a  
46  
47 137 12-year study period, according to sex, age, focusing on children and young  
48  
49 138 adults (0 to 20 years old) and imaging test. In addition, we identified the clinical  
50  
51 139 context of patients with potentially high cumulative radiation risks.  
52  
53  
54  
55

56 140  
57  
58  
59 141  
60

1  
2  
3 142 **Methods**  
4

5  
6 143 Study design  
7

8  
9 144 We conducted a retrospective cohort study to analyse the individual cumulative  
10  
11 145 effective dose in routine practice and the recurrent imaging diagnostic tests.  
12

13  
14 146 Setting  
15

16  
17 147 The target population for the study were all residents in the catchment area of  
18  
19 148 San Juan Hospital (Alicante), in the Valencian Community (Spain), a general  
20  
21 149 centre, with a catchment population of 234,424 people. This is a referral  
22  
23 150 hospital for all individuals living in the catchment area who belong to the  
24  
25 151 National Health Care System (NHS). The majority of the Spanish population  
26  
27 152 uses the NHS as the main medical service (the publicly funded insurance  
28  
29 153 scheme covers 98.5% of the Spanish population) and hence, only a small  
30  
31 154 percentage of patients are likely to have had imaging tests outside this setting.  
32  
33  
34

35  
36 155 Participants  
37

38  
39 156 We selected the population who belonged to the catchment area of that hospital  
40  
41 157 during the year 2007, and collected all consecutive diagnostic imaging tests  
42  
43 158 undergone by this population until 31<sup>st</sup> December 2018 (in any care setting,  
44  
45 159 inpatient, outpatient, or emergency department). Cohort members remained in  
46  
47 160 the study until their exit date or they left the catchment area. We assigned each  
48  
49 161 person to the unexposed group from the date of entry until the date of the first  
50  
51 162 imaging test, and to the exposed group from the date of the first imaging test  
52  
53 163 until the exit date. In addition, in those patients who did not account for the 12  
54  
55 164 years of follow-up, we assumed future practice estimating the proportion of  
56  
57  
58  
59  
60



1  
2  
3 165 imaging tests that would have been carried out during the remaining period if  
4  
5 166 the patients had been in the cohort, except for the > 80 age group, where did  
6  
7 167 not implemented this strategy given that the expectancy life in Spain is 82.83  
8  
9 168 years old.

10  
11  
12  
13 169 We excluded: imaging tests that did not involve radiation exposure (ie, MRI and  
14  
15 170 ultrasound) and patients who had an imaging test in this hospital but did not  
16  
17 171 belong to its catchment area.

18  
19  
20  
21 172 We classified the population in different age groups, and we focused our  
22  
23 173 estimations in the 0-20 year old group due to their increased cancer risk.

24  
25  
26 174 In order to check generalizability of our data, we compare our population with  
27  
28 175 Spanish population on the 31<sup>st</sup> December 2007<sup>18</sup>.

29  
30  
31 176 Imaging test frequency

32  
33  
34 177 We collected the following data from Medical Image Bank of the Valencian  
35  
36 178 Community from the Department of Universal Health and Public Health Service  
37  
38 179 (BIMCV-CSUSP): sex and age at entry in the study, radiological examination  
39  
40 180 and date. Both the images and the patient data were anonymized and de-  
41  
42 181 identified by the Health Informatics Department of the Hospital of San Juan  
43  
44 182 using R&D Cloud CEIB Architecture<sup>7</sup> This digital register started in 2007 in our  
45  
46 183 setting.

47  
48  
49  
50  
51 184 According to previous studies<sup>16</sup>, each imaging test received was classified as a  
52  
53 185 single radiation exposure. However, abdomen and pelvis tests carried out in the  
54  
55 186 same process were included as a single abdomen-pelvis test, while an  
56  
57 187 abdomen or pelvis test in a different process, even in the same patient, were

1  
2  
3 188 included as two different tests. Thoracic and lumbar spine tests were included  
4  
5 189 when they were performed alone but not when performed together with chest or  
6  
7 190 abdominal tests.  
8

9  
10 191 Effective dose estimate:

11  
12  
13 192 Given that it was impossible to get individual machine parameters for all  
14  
15 193 imaging tests, we estimated the associated radiation effective dose per test  
16  
17 194 according to its region of anatomical coverage by age and using previously  
18  
19 195 published evidence<sup>19</sup>. This review provides values of the typical effective doses  
20  
21 196 associated with the 20 most frequent imaging tests for adults and children and  
22  
23 197 for the most widely used set of weights (ICRP60) as well as for the most recent  
24  
25 198 (ICRP103). We based our estimates on ICRP103, except in those cases where  
26  
27 199 we did not have enough information. In addition, we estimated the effective  
28  
29 200 dose of imaging tests different from the 20 most frequent imaging tests in Dose  
30  
31 201 Datamed 2 project according to previous bibliography<sup>20-22</sup> (supplementary  
32  
33 202 material tables 1 and 2).  
34  
35  
36  
37  
38

39 203 Clinical classification of high-risk patients.

40  
41  
42 204 We examined the clinical context of patients receiving the highest dose  
43  
44 205 radiation. In accordance with previous studies<sup>16</sup>, we classified patients with  
45  
46 206 diagnosis of neoplasm as patients at high risk of receiving high doses of  
47  
48 207 radiation. We reviewed the digital register to establish which patients, who  
49  
50 208 underwent an imaging test, had the ICD11 code of neoplasms (from 1993,  
51  
52 209 when the register started, until the date of the first imaging test they underwent  
53  
54 210 in our study).  
55  
56  
57  
58  
59  
60

1  
2  
3 211 Patient and public involvement:  
4

5  
6 212 Patients and the public were not involved in the design, conduct and reporting of  
7  
8 213 the research.  
9

10  
11 214 Statistical analysis  
12

13  
14 215 We estimated the imaging test frequency as the number of people having at  
15  
16 216 least 1 test during the study period until the 31<sup>st</sup> December 2018 (final exposure  
17  
18 217 status) and it was classified by sex and age. We also estimated the per-patient  
19  
20 218 cumulative diagnostic imaging test during the period of study by adding up the  
21  
22 219 number of tests received by each patient, and then evaluated the differences by  
23  
24 220 sex and age group using the Chi squared test. We also calculated the median  
25  
26 221 and maximum number of imaging tests in our population and assessed the  
27  
28 222 differences by sex and age using the Mann–Whitney U test.  
29  
30  
31

32  
33 223 Cumulative effective dose estimates were obtained by adding effective dose  
34  
35 224 estimates received in each test in the patient's history. Data were expressed as  
36  
37 225 the median, maximum and 25, 75, 95 percentiles. Differences by sex and age  
38  
39 226 group were assessed using the Mann–Whitney U test.  
40  
41  
42

43 227 We also classified the population according to the cumulative effective dose  
44  
45 228 received during the period of study in the following way: 0-50 mSv, >50-100  
46  
47 229 mSv and >100 mSv<sup>9</sup> and evaluated the differences in these groups by sex and  
48  
49 230 age group using the Chi squared test.  
50  
51

52  
53 231 We carried out a sub-group analysis to analyse the different cumulative  
54  
55 232 effective dose in patients having CT and in those having plain radiograph  
56  
57 233 (supplementary material).  
58  
59  
60

1  
2  
3 234 The statistical analyses of the data were performed with SPSS (Version 25.0;  
4  
5 235 SPSS Inc, Chicago, IL). A p-value 0.05 was considered significant.  
6  
7

## 8 236 **Results**

### 10 237 *Cohort characteristics*

11  
12  
13  
14 238 The cohort included 232,446 people: 53.7% women and 46.3% men. The  
15  
16 239 distribution by sex and age was similar to Spanish general population.

17  
18  
19 240 Of 232,446 people included in the cohort study, 154,520 (68.8%) underwent an  
20  
21 241 imaging test associated with radiation during the period of study, with different  
22  
23 242 frequency for men (69,265/107,622; 66.6%) and women (85,255/123,196;  
24  
25 243 70.6%) ( $p < 0.001$ ) (table 1). The number of people having at least 1 exam during  
26  
27 244 the study period (defined as imaging test frequency) ranged from 56.5% in the  
28  
29 245 20 to 30 age group to the highest percentage, 73.1%, in the 60 to 80 year old  
30  
31 246 group.  
32  
33  
34

### 35 247 *Characteristics of imaging tests undergone during period of study.*

36  
37  
38  
39 248 Overall, the population had a total of 1,335,752 imaging tests during the period  
40  
41 249 of study.  
42  
43

44  
45 250 The type of imaging tests carried out were: 1,110,077 (83.0%) plain  
46  
47 251 radiography; 156,848 (11.8%) CT; 63,157 (4.8%) fluoroscopy, and 5,670 (0.4%)  
48  
49 252 interventional radiography. Men were more likely to have CT (14.3%) than  
50  
51 253 women (10.1%) and women were more likely to have fluoroscopy (7.1%) than  
52  
53 254 men (1.6) ( $p = 0.035$ ). Moreover, the percentage of people who had a CT  
54  
55 255 increased with age (from 1.2% in the 0 to 5 age group to 15.4% in the 60 to 70  
56  
57 256 age group (table 2).  
58  
59  
60

1  
2  
3 257 *Recurrent imaging tests.*  
4  
5

6 258 The population exposed undergone a median of 5 imaging tests and 52.9% of  
7  
8 259 the patients underwent 5 or more examinations. Women were more likely to  
9  
10 260 have more cumulative imaging tests than men during this period (maximum 221  
11  
12 261 in men and 633 in women; interquartile range 2-10 in men and 2-12 in women,  
13  
14  
15 262  $p < 0.001$ ).

16  
17  
18 263 Table 3 shows distribution data for per-patient imaging tests (median and  
19  
20 264 maximum) by age and sex for each type of imaging test.

21  
22  
23 265 Moreover, 8.2% of the patients who had an imaging test during the period of  
24  
25 266 study and 25.4% (12,602/49,544) of the patients who had a CT, underwent 5 or  
26  
27 267 more CTs (5.5% (174/3,187) in the 0 to 20 age group), with a maximum of 75  
28  
29 268 examinations; 1.8% of the patients who had an imaging test and 9.7%  
30  
31 269 (2,849/29,314) of the patients who had a fluoroscopy examination, underwent 5  
32  
33 270 or more fluoroscopy examinations (1.9% (28/1,478) in the 0 to 20 age group),  
34  
35 271 with a maximum of 18 examinations; 0.2% of the patients who had an imaging  
36  
37 272 test and 5.8% of the patients who had an interventional radiography, underwent  
38  
39 273 3 or more interventional radiographies, with a maximum of 10 examinations,  
40  
41 274 and 21.2% of the patients who had an imaging test and 21.6% (32,778/151,980)  
42  
43 275 of the patients who had a plain radiography, underwent 10 or more plain  
44  
45 276 radiographies (10.1% (2,849/28,356) in the 0 to 20 age group), with a maximum  
46  
47 277 of 559 examinations.

48  
49 278 Men were more likely to have more than 5 CTS than women (27.8% vs 23.3%,  
50  
51 279  $p < 0.001$ ), and less likely to have more than 5 fluoroscopy examinations (2.3%

1  
2  
3 280 vs 11.6%,  $p<0.001$ ) and more than 10 plain radiographies than women (19.6%  
4  
5 281 vs 23.2%,  $p<0.001$ , respectively) (data not shown).  
6  
7

8 282 *Cumulative effective dose received during the period of study.*  
9

10  
11 283 The median total cumulative effective dose including all imaging tests in all  
12  
13 284 population exposed was 2.10 mSv (maximum 3980.30). Women received more  
14  
15 285 effective dose than men (median 2.38 vs median 1.90,  $p<0.001$ ). The  
16  
17 286 cumulative effective dose increased with age: median 0.72 (maximum 47.15) in  
18  
19 287 the 0 to 5 age group and median 10.20 (maximum 3980.309) in the 70 to 80  
20  
21 288 age group ( $p<0.001$ ) (table 4).  
22  
23  
24  
25

26 289 If we consider the cumulative effective dose associated with plain-radiograph  
27  
28 290 (table S3), the median total cumulative effective dose was 0.70 mSv (maximum  
29  
30 291 2112.79). There were also differences by sex: women received more effective  
31  
32 292 dose than men (median 1.02 vs median 0.64,  $p<0.001$ ).  
33  
34  
35

36 293 Considering the cumulative effective dose associated with CT (table S4), the  
37  
38 294 median total cumulative effective dose was 16.30 mSv (maximum 1419.30).  
39  
40 295 Men received more effective dose than women (median 19.80 vs median 13.20,  
41  
42 296  $p<0.001$ ). 2.5% of the patients in the 0 to 20 group received more than 50 mSv.  
43  
44

45 297 A total of 4,844 (3.1%) people received cumulative doses between 50-100 mSv  
46  
47 298 and 2,298 (1.5%) people received doses greater than 100 mSv. Men were more  
48  
49 299 likely to have cumulative effective dose above 50 mSv (both between 50 and  
50  
51 300 100 mSv (3.5%) and higher than 100 mSv (1.8%), than women (2.9% and  
52  
53 301 1.2%, respectively) ( $p<0.001$ ). Of the 2,298 patients who received more than  
54  
55 302 100 mSv during the 12-year study period, 725 (33.3%) were patients in the 60  
56  
57  
58  
59  
60

1  
2  
3 303 to 70 age group; 565 (24.6%) were patients in the 50 to 60 age group; 462  
4  
5 304 (20.1%) were patients in the 70 to 80 age group, and 350 (15.2%) were patients  
6  
7  
8 305 in the 40 to 50 age group (table 5).  
9

10 306 If we consider the cumulative effective dose associated with plain-radiograph,  
11  
12 307 almost 100% of people received cumulative effective dose below 50 mSv.  
13

14 308 Considering the cumulative effective dose associated with CT, 17.8% of people  
15  
16 309 received doses above 50 mSv (8.2% above 100 mSv).  
17  
18

19  
20 310 *Classification of high-risk patients.*  
21

22  
23 311 Of the 154,520 patients who had an imaging test during the period of study,  
24  
25 312 11,072 (7.1%) had a diagnosis of cancer during the period of study. Out of  
26  
27 313 2,298 patients who received more than 100 mSv, 1,678 (73.0 %) had a  
28  
29 314 diagnosis of cancer, compared with 43.14% of patients who received between  
30  
31 315 50 and 100 mSv and 4.9 % of patients who received less than 50 mSv.  
32  
33  
34  
35  
36  
37  
38  
39  
40  
41  
42  
43  
44  
45  
46  
47  
48  
49  
50  
51  
52  
53  
54  
55  
56  
57  
58  
59  
60

## 324 Discussion

325 This study provides important information on the cumulative radiation dose  
326 received by patients in routine practice. We showed that the median cumulative  
327 effective dose including all the imaging tests during the 12-year study period  
328 was 2.10 mSv (maximum 3,980.30). However, the median cumulative effective  
329 dose associated with only CT was 16.30 (maximum 1419.30).

330 The median cumulative effective dose was therefore lower than the 100 mSv  
331 threshold often considered for significant risks in stochastic theory<sup>23</sup>.  
332 Nevertheless, 4,844 (3.1%) people received between 50 and 100 mSv and  
333 2,298 (1.5%) more than 100 mSv during the study period. In addition, 17.8% of  
334 people who had CTs received doses above 50 mSv and 8.2% of them, doses  
335 above 100 mSv. A previous study evaluated CT use in general practice during  
336 an 8-year period (1998-2005) and showed that nearly 50% of the population  
337 had CT and 1.2% of them received doses >100 mSv. The longer follow-up  
338 period in our study (12 years vs 8 years) does not justify the much higher  
339 cumulative effective dose associated with CT shown in our patients.

340 However, our frequencies are lower than those reported in a previous study  
341 where 15% received estimated cumulative effective doses of more than 100  
342 mSv<sup>16</sup>. This study included adult patients who had received CT during the  
343 previous 22 years while our cohort study included general population. In  
344 addition, we only showed data from a 12-year period, so the percentage of  
345 patients with an effective dose higher than 100 mSv during their lifetime will be  
346 even higher. Moreover, according to linear theory, smaller doses have the



1  
2  
3 347 potential to cause a small increase in cancer risk<sup>24</sup>. However, the cancer rates  
4  
5 348 did not change in our cohort during the period of study.  
6  
7

8 349 Previous research focused on patients <20 years of age<sup>25</sup> showed that of the  
9  
10 350 22,867 patients who had CT during an 8-year period, 1.6% received doses  
11  
12 351 higher than 50 mSv. In our cohort study, the percentage was lower, but we  
13  
14 352 included all imaging tests (radiography and CT). In the subgroup analysis by  
15  
16 353 type of imaging test, we observed higher rates in the CT group in the 0 to 20  
17  
18 354 age group (2.5%). Greater efforts to decrease the number of recurrent CTs in  
19  
20 355 children have to be implemented, taking into account that a recent study  
21  
22 356 showed that even low doses of ionizing radiation increase the risk of childhood  
23  
24 357 leukemia<sup>26</sup>.  
25  
26  
27  
28

29 358 These results which show high rates of population undergoing imaging tests are  
30  
31 359 in line with the DoseData Med II project<sup>3</sup>, in which Spain had one of the greatest  
32  
33 360 frequency of imaging tests per 1000 population in comparison with the  
34  
35 361 European average.  
36  
37  
38

39 362 We also found high rates of recurrent CT (25.4% of the patients who had a CT,  
40  
41 363 underwent 5 or more CTs, with a maximum of 75 examinations). Previous  
42  
43 364 studies have shown higher rates of recurrent CT (33% of patients underwent 5  
44  
45 365 or more CT examinations)<sup>6</sup>, but they included a longer followed-up period (22  
46  
47 366 years vs 12 years). Moreover, 5.8% of the patients who had an interventional  
48  
49 367 radiography, underwent 3 or more interventional radiographies during the period  
50  
51 368 of study, with a maximum of 10 examinations. Both interventional radiography  
52  
53 369 and CT, are associated with a relatively high dose of radiation. Plain  
54  
55 370 radiography and fluoroscopy, although they are not associated with such high  
56  
57  
58  
59  
60

1  
2  
3 371 doses, also showed a high recurrent rate. Additional measures should be  
4  
5 372 applied to control these recurrent rates, particularly to subgroups who are more  
6  
7 373 prone to recurrent controls such as patients with chronic diseases like cancer.  
8  
9

10 374 In fact, as in previous studies<sup>16</sup>, most of the patients who received more than  
11  
12 375 100 mSv had previous history of malignancy. However, 27% of them had no  
13  
14 376 underlying malignant disease. In both groups of patients, clinicians should  
15  
16 377 balance the risk of the cumulative exposure against the benefit of recurrent  
17  
18 378 imaging.  
19  
20  
21  
22

23 379 Most of our population younger than 20 years old received effective dose lower  
24  
25 380 than 50 mSv during the period of study; however, more than 40% of this  
26  
27 381 population underwent 5 or more imaging tests during this period and 5% of  
28  
29 382 them had 5 or more CTs. Moreover, the maximum number of plain radiography,  
30  
31 383 CT, fluoroscopy and interventional radiography examinations undergone was  
32  
33 384 86, 17, 8 and 7, respectively in this age group. The linear no-threshold model is  
34  
35 385 very controversial and is considered of little relevance for doses below 100mSv;  
36  
37 386 nevertheless, we have to take into account that children are more sensitive to  
38  
39 387 ionizing radiation effects due to their high radiosensitivity<sup>27, 28</sup>. In addition,  
40  
41 388 previous studies have shown a possible risk of cancer from radiation associated  
42  
43 389 with commonly used tests, such as computed tomography scan, in children at  
44  
45 390 very young ages<sup>29</sup>.  
46  
47  
48  
49  
50

51 391 There is increasing international interest in reducing radiation doses from  
52  
53 392 imaging tests<sup>30</sup>. Previous studies have shown difficulties when implementing  
54  
55 393 initiatives to reduce radiation exposure into clinical practice. For instance,  
56  
57 394 communication with patients regarding associated risk is essential to get a  
58  
59  
60

1  
2  
3 395 rational use of diagnostic imaging test, but there is a lack of knowledge in the  
4  
5 396 general population regarding radiation exposure and the associated risks  
6  
7 397 related to these tests<sup>31, 32</sup>. In addition, recent studies showed that most  
8  
9 398 clinicians were unaware of radiation exposure associated with imaging tests<sup>33-35</sup>  
10  
11 399 and that less than 50% of the imaging tests carried out in clinical practice were  
12  
13 400 considered appropriate according to the available recommendations and 29.1%  
14  
15 401 of the total collective effective dose was associated with inappropriate imaging  
16  
17 402 tests<sup>36</sup>.

21  
22 403 Assessing the amount of effective dose that patients receive during their  
23  
24 404 lifetime, as the European Commission of Radiological Protection  
25  
26 405 recommends<sup>11</sup>, could therefore be considered a useful tool to raise awareness  
27  
28 406 among clinicians and patients regarding the risks associated, and to help them  
29  
30 407 to reach a shared decision when asking for imaging tests to reduce cancer risk.  
31  
32 408 However, an effort should be made to reduce the great variation in CT  
33  
34 409 protocols, technical parameters and radiation doses across countries<sup>37</sup>.

35  
36 410 Limitations of our study included the retrospective design and lack of  
37  
38 411 information regarding patients who might have been imaged outside the  
39  
40 412 healthcare system, as well as radiation derived from nuclear medicine that also  
41  
42 413 represents a relevant proportion of the collective population dose<sup>12, 13</sup>. However,  
43  
44 414 as we stated previously, the publicly funded insurance scheme covers 98.5% of  
45  
46 415 the Spanish population and only a small percentage of patients are likely to  
47  
48 416 have had imaging tests outside this setting.

49  
50 417 Moreover, given that we studied the imaging tests carried out during a 12-year  
51  
52 418 period, some patients could have been lost to follow-up. Based on practice  
53  
54  
55  
56  
57  
58  
59  
60

1  
2  
3 419 during this 12-year period, we estimated the proportion of imaging tests that  
4  
5 420 would have been carried out during the remaining period if the patients had  
6  
7 421 been in the cohort.  
8  
9

10 422 We used the available evidence to estimate the effective dose for each imaging  
11  
12 423 test, as is proposed by the Dosedatamed project<sup>12, 13</sup>. However, this type of  
13  
14 424 estimation has inherent limitations; it does not take into account the test date,  
15  
16 425 the scanner model or the patient's characteristics. Nevertheless, it does not  
17  
18 426 affect the overall result. It is also true that our results may differ from those of  
19  
20 427 studies in different settings. We used effective dose to quantify the radiation  
21  
22 428 exposure associated with each imaging test instead of organ doses. Absorbed  
23  
24 429 organ doses are important for some procedures that either involve high doses  
25  
26 430 or include sensitive tissues in the primary radiation beam<sup>4</sup>. However, our aim  
27  
28 431 was not to assess cancer risks associated with medical ionizing radiation but to  
29  
30 432 compare across the different imaging tests carried out in our population.  
31  
32  
33  
34  
35

36 433 We included a general hospital and its catchment area (with a total population  
37  
38 434 over 200,000 people). Even though our results could have some limited  
39  
40 435 generalisability in other settings, analysing this population provides important  
41  
42 436 insights, showing as far as we know, the first evaluation of the cumulative  
43  
44 437 effective dose in routine practice (including adults and children) according to  
45  
46 438 age and sex over a 12 year-period. In addition, as we showed in the result  
47  
48 439 section, the population included in this study is similar to general Spanish  
49  
50 440 population.  
51  
52  
53  
54

55 441

56 442  
57  
58  
59  
60

## 443 **Conclusions**

444 A total of 4,844 (3.1%) people received cumulative doses between 50-100 mSv  
445 and 2,298 (1.5%) people received doses greater than 100 mSv during the 12-  
446 year period of study. Considering only the doses associated with CT, 2.5% of  
447 the patients in the 0 to 20 age group received doses above 50 mSv. Moreover,  
448 the rate of recurrent examinations was high, especially in older patients, but  
449 also relevant in the 0 to 20 age group. These data could help clinicians to make  
450 an informed decision when asking for each imaging test, which would lead to  
451 lower cumulative lifetime radiation, and consequently a reduction in associated  
452 risks.

453

454

455

456

457

458

459

460

461

462

463

1  
2  
3 464 **Funding statement:** This research received no specific grant from any funding  
4  
5 465 agency in the public, commercial or not-for-profit sectors.  
6  
7

8 466 **Competing interest declaration**  
9

10  
11 467 There are not competing interest to declare.  
12  
13

14 468 **Contributors:** BL, IGA and JMS conceived of and designed the study. BL and  
15  
16 469 JMS acquired the data. BL and JMS prepared the data and BL, JMS and IGA  
17  
18 470 interpreted statistical analyses. BL did the statistical analyses and drafted the  
19  
20 471 data tables. BL, JMS and IGA co-wrote the manuscript. All authors critically  
21  
22 472 revised the paper for important intellectual content and approved the final  
23  
24 473 version.  
25  
26  
27

28 474 **Ethical approval:** The study was approved by the institutional review board at  
29  
30 475 San Juan Alicante Hospital (14/301).  
31  
32

33 476 **Data sharing:** Data generated by the research that supports this manuscript  
34  
35 477 will be available as soon as possible wherever legally and ethically possible.  
36  
37  
38

39 478  
40

41 479  
42  
43

44 480  
45  
46

47 481  
48  
49

50 482  
51  
52

53 483  
54  
55

56 484  
57  
58  
59  
60

## 485 Bibliography

- 486 1. Parkin DM, Darby SC. Cancers in 2010 attributable to ionising radiation  
487 exposure in the UK. *Br J Cancer* 2011;Suppl 2:S57-65. doi:  
488 10.1038/bjc.2011.485. pmid: 22158322.
- 489 2. United Nations Scientific Committee on the Effects of Atomic Radiation  
490 (UNSCEAR), Effects of ionizing radiation. UNSCEAR 2006 report to the  
491 general assembly, with scientific annexes. United Nations, 2006.
- 492 3. Sodickson A, Baeyens PF, Andriole KP, Prevedello LM, Nawfel RD,  
493 Hanson R, Khorasani R. Recurrent CT, cumulative radiation exposure,  
494 and associated radiation-induced cancer risks from CT of adults.  
495 *Radiology* 2009;251:175-84. doi: 10.1148/radiol.2511081296. pmid:  
496 19332852.
- 497 4. Committee to Assess Health Risks from Exposure to Low levels of  
498 Ionizing Radiation; Nuclear and Radiation Studies Board, Division on  
499 Earth and Life Studies, National Research Council of the National  
500 Academies. Health Risks From Exposure to Low Levels of Ionizing  
501 Radiation: BEIR VII Phase 2. Washington, DC: The National Academies  
502 Press; 2006.
- 503 5. National Research Council. Health risks from exposure to low levels of  
504 ionizing radiation: BEIR VII phase 2. Washington, DC: The National  
505 Academies Press; 2006.
- 506 6. Grant EJ, Brenner A, Sugiyama H et al. Solid Cancer Incidence among  
507 the Life Span Study of Atomic Bomb Survivors: 1958-2009. *Radiat Res*  
508 2017;187:513-537. doi: 10.1667/RR14492.1 pmid: 28319463.

- 1  
2  
3 509 7. Marant-Micallef C, Shield KD, Vignat J et al. The risk of cancer  
4  
5 510 attributable to diagnostic medical radiation: Estimation for France in  
6  
7 511 2015. *Int J Cancer* 2019;144:2954-2963. doi: 10.1002/ijc.32048. pmid:  
8  
9 512 30537057.
- 10  
11  
12 513 8. Bosch de Basea M, Moríña D, Figuerola J et al. Subtle excess in lifetime  
13  
14 514 cancer risk related to CT scanning in Spanish young people. *Environ Int*  
15  
16 515 2018;120:1-10. doi: 10.1016/j.envint.2018.07.020. pmid: 30053755.
- 17  
18  
19 516 9. Hall EJ, Brenner DJ. Cancer risks from diagnostic radiology. *Br J Radiol*  
20  
21 517 2008;81:362–78. doi: 10.1259/bjr/01948454. pmid: 18440940.
- 22  
23  
24 518 10. Pearce MS, Salotti JA, Little MP. Radiation exposure from CT scans in  
25  
26 519 childhood and subsequent risk of leukaemia and brain tumours: a  
27  
28 520 retrospective cohort study. *Lancet* 2012;380:499-505. doi:  
29  
30 521 10.1016/S0140-6736(12)60815-0. pmid: 22681860.
- 31  
32  
33 522 11. European Council Directive. 2013/59/Euratom on basic safety standards  
34  
35 523 for protection against the dangers arising from exposure to ionising  
36  
37 524 radiation and repealing Directives 89/618/Euratom, 90/641/Euratom,  
38  
39 525 96/29/Euratom, 97/43/Euratom and 2003/122/ Euratom. OJ of the EU  
40  
41 526 2014;L13 57:1–73.
- 42  
43  
44 527 12. European Commission on Radiological Protection Publication 154, 2008.  
45  
46 528 European Guidance on Estimating Population Doses from Medical X-  
47  
48 529 Ray Procedures. Available from:  
49  
50 530 [http://ddmed.eu/\\_media/background\\_of\\_ddm1:rp154.pdf](http://ddmed.eu/_media/background_of_ddm1:rp154.pdf).
- 51  
52  
53 531 13. European Commission on Radiological Protection Publication 180, 2014.  
54  
55 532 Diagnostic Reference Levels in Thirty-Six European Countries. Available  
56  
57 533 from: <https://ec.europa.eu/energy/sites/ener/files/documents/RP180.pdf>.



- 1  
2  
3 534 14. Guttikonda R, Herts BR, Dong F, Baker ME, Fenner KB, Pohlman B.  
4  
5 535 Estimated radiation exposure and cancer risk from CT and PET/CT  
6  
7 536 scans in patients with lymphoma. *Eur J Radiol* 2014;83:1011-1015.  
8  
9 doi:10.1016/j.ejrad.2014.02.015 pmid: 24656401.  
10 537  
11  
12 538 15. Law M, Ma WK, Chan E et al. Evaluation of cumulative effective dose  
13  
14 539 and cancer risk from repetitive full spine imaging using EOS system:  
15  
16 540 Impact to adolescent patients of different populations. *Eur J Radiol*  
17  
18 541 2017;96:1-5. doi:10.1016/j.ejrad.2017.09.006 pmid: 29103466.  
19  
20  
21 542 16. Sodickson A, Baeyens PF, Andriole KP et al. Recurrent CT, cumulative  
22  
23 543 radiation exposure, and associated radiation-induced cancer risks from  
24  
25 544 CT of adults. *Radiology* 2009;251:175-84.  
26  
27 545 doi:10.1148/radiol.2511081296 pmid: 19332852.  
28  
29  
30 546 17. Amis ES Jr, Butler PF, Applegate KE et al; American College of  
31  
32 547 Radiology. American College of Radiology white paper on radiation dose  
33  
34 548 in medicine. *Am Coll Radiol* 2007;4:272-84. doi:  
35  
36 549 10.1016/j.jacr.2007.03.002. pmid: 17467608  
37  
38  
39 550 18. Spanish Statistical Office: Population figures and Demographic  
40  
41 551 Censuses. Available from:  
42  
43 552 <https://www.ine.es/dynt3/inebase/en/index.htm?padre=1894&capsel=189>  
44  
45 553 [5](#).  
46  
47  
48 554 19. Vilar-Palop J, Vilar J, Hernández-Aguado I, et al. Updated effective  
49  
50 555 doses in radiology. *J Radiol Prot* 2016;36:975–90. doi: 10.1088/0952-  
51  
52 556 4746/36/4/975 pmid: 27893456.  
53  
54  
55  
56  
57  
58  
59  
60

- 1  
2  
3 557 20. Shrimpton PC, Hillier MC, Lewis MA, Dunn M. National survey of doses  
4  
5 558 from CT in the UK: 2003. *Br J Radiol* 2006;79:968-80. doi:  
6  
7 559 10.1259/bjr/93277434. pmid: 17213302.  
8  
9  
10 560 21. Mettler F A, Huda W, Yoshizumi TT, Mahesh M. Effective doses in  
11  
12 561 radiology and diagnostic nuclear medicine: a catalog. *Radiology*  
13  
14 562 2008;248:254-63. doi: 10.1148/radiol.2481071451. pmid: 18566177.  
15  
16  
17 563 22. Cohnen M, Poll LJ, Puettmann C, Ewen K, Saleh A, Mödder U. Effective  
18  
19 564 doses in standard protocols for multi-slice CT scanning. *Eur Radiol*  
20  
21 565 2003;13:1148-53. doi: 10.1007/s00330-002-1614-9. pmid: 12695839.  
22  
23  
24 566 23. Lin EC. Radiation Risk From Medical Imaging. *Mayo Clin Proc* 2010; 85:  
25  
26 567 1142–1146. doi: 10.4065/mcp.2010.0260. pmid: 21123642.  
27  
28  
29 568 24. Grant EJ, Brenner A, Sugiyama H et al. Solid Cancer Incidence among  
30  
31 569 the Life Span Study of Atomic Bomb Survivors: 1958-2009. *Radiat Res*  
32  
33 570 2017;187:513-537. doi: 10.1667/RR14492.1 pmid: 28319463.  
34  
35  
36 571 25. Inman M, Otley A, Dummer T, Cui Y, Schmidt MH, Parker L. Childhood  
37  
38 572 exposure to ionizing radiation from computed tomography imaging in  
39  
40 573 Nova Scotia. *Paediatr Child Health* 2015;20:381-5. Doi:  
41  
42 574 10.1093/pch/20.7.381. pmid: 26526506.  
43  
44  
45 575 26. Nikkilä A, Raitanen J, Lohi O, Auvinen A. Radiation exposure from  
46  
47 576 computerized tomography and risk of childhood leukemia: Finnish  
48  
49 577 register-based case-control study of childhood leukemia (FRECCLE).  
50  
51 578 *Haematologica* 2018;103:1873-1880. doi:  
52  
53 579 10.3324/haematol.2018.187716. pmid: 29976736.  
54  
55  
56 580 27. Mathews JD, Forsythe AV, Brady Z et al. Cancer risk in 680,000 people  
57  
58 581 exposed to computed tomography scans in childhood or adolescence:  
59  
60

- 1  
2  
3 582 data linkage study of 11 million Australians. *BMJ* 2013;346:f2360. doi:  
4  
5 583 10.1136/bmj.f2360.13 pmid: 23694687.  
6  
7  
8 584 28.13. Meulepas JM, Ronckers CM, Smets AMJB et al. Radiation exposure  
9  
10 585 from pediatric CT scans and subsequent cancer risk in the Netherlands.  
11  
12 586 *J Natl Cancer Inst* 2019;111:256-263. doi: 10.1093/jnci/djy104 pmid:  
13  
14 587 30020493.  
15  
16  
17 588 29.14. Rajaraman P, Simpson J, Neta G et al. Early life exposure to  
18  
19 589 diagnostic radiation and ultrasound scans and risk of childhood cancer:  
20  
21 590 case-control study. *BMJ* 2011;342:d472. doi: 10.1136/bmj.d472 pmid:  
22  
23 591 21310791.  
24  
25  
26 592 30. Amis ES Jr, Butler PF; American College of Radiology. ACR white paper  
27  
28 593 on radiation dose in medicine: three years later. *J Am Coll Radiol*  
29  
30 594 2010;7:865-70. doi: 10.1016/j.jacr.2010.04.006 pmid: 21040868.  
31  
32  
33 595 31. Lumbreras B, Vilar J, González-Álvarez I et al. Avoiding fears and  
34  
35 596 promoting shared decision-making: How should physicians inform  
36  
37 597 patients about radiation exposure from imaging tests? *PLoS One*  
38  
39 598 2017;12:e0180592. doi: 10.1371/journal.pone.0180592 pmid: 28686656.  
40  
41  
42 599 32. Bedetti G, Pizzi C, Gavaruzzi G, Lugaresi F, Cicognani A, Picano E.  
43  
44 600 Suboptimal awareness of radiologic dose among patients undergoing  
45  
46 601 cardiac stress scintigraphy. *J Am Coll Radiol* 2008;5:126-31. doi:  
47  
48 602 10.1016/j.jacr.2007.07.020. pmid: 18242529.  
49  
50  
51 603 33. Lumbreras B, Vilar J, González-Álvarez I, Guilabert M, Parker LA,  
52  
53 604 Pastor-Valero M et al. Evaluation of clinicians' knowledge and practices  
54  
55 605 regarding medical radiological exposure: findings from a mixed-methods  
56  
57  
58  
59  
60

- 1  
2  
3 606 investigation (survey and qualitative study). *BMJ Open* 2016;6:e012361.  
4  
5 607 doi: 10.1136/bmjopen-2016-012361 pmid: 27799242.  
6  
7 608 34. Soye JA, Paterson A. A survey of awareness of radiation dose among  
8  
9 health professionals in Northern Ireland. *Br J Radiol* 2008;81:725-9. doi:  
10 609  
11 10.1259/bjr/94101717. pmid: 18591196  
12 610  
13 611 35. Zhou GZ, Wong DD, Nguyen LK, Mendelson RM. Student and intern  
14  
15 awareness of ionising radiation exposure from common diagnostic  
16 612  
17 imaging procedures. *J Med Imaging Radiat Oncol* 2010;54:17-23. doi:  
18 613  
19 10.1111/j.1754-9485.2010.02132.x. pmid: 20377710.  
20 614  
21 615 36. Vilar-Palop J, Hernandez-Aguado I, Pastor-Valero M, Vilar J, González-  
22  
23 Alvarez I, Lumbreras B. Appropriate use of medical imaging in two  
24 616  
25 Spanish public hospitals: a cross-sectional analysis. *BMJ Open*  
26 617  
27 2018;8:e019535. doi: 10.1136/bmjopen-2017-019535 pmid: 29549204.  
28 618  
29 619 37. Smith-Bindman R, Wang Y, Chu P et al. International variation in  
30  
31 radiation dose for computed tomography examinations: prospective  
32 620  
33 cohort study. *BMJ* 2019;364:k4931. doi: 10.1136/bmj.k4931 pmid:  
34 621  
35 30602590.  
36 622  
37  
38  
39  
40  
41  
42  
43  
44  
45  
46  
47  
48  
49  
50  
51  
52  
53  
54  
55  
56  
57  
58  
59  
60

**Table 1. Characteristics of study population by final exposure status (Exposure status at end of study. All study members were classified as unexposed on entry to the study), based on 12-year period of study (2007-2018) and comparison with Spanish general population on the 31<sup>st</sup> December 2007.**

| Age at entry to study (years) | Number (%) of people having at least 1 imaging test in the study* |                       |                        | Total number (%) of people in the study |                        |                        | Total number (%) of Spanish general population |                           |                           |
|-------------------------------|-------------------------------------------------------------------|-----------------------|------------------------|-----------------------------------------|------------------------|------------------------|------------------------------------------------|---------------------------|---------------------------|
|                               | Men                                                               | Women                 | Total                  | Men                                     | Women                  | Total                  | Men                                            | Women                     | Total                     |
| <b>0-5</b>                    | 3938 (5.7)                                                        | 3693 (5.3)            | 7,631 (4.9)            | 5660 (5.3)                              | 6564 (5.3)             | 12,224 (5.3)           | 1287417 (5.6)                                  | 1213658 (5.1)             | 2501081 (5.3)             |
| <b>&gt;5-10</b>               | 3798 (5.5)                                                        | 3387 (4.9)            | 7,185 (4.6)            | 5540 (5.1)                              | 6425 (5.2)             | 11,965 (5.1)           | 1259447 (5.5)                                  | 1181161 (4.9)             | 2440613 (5.2)             |
| <b>&gt;10-15</b>              | 3611 (5.2)                                                        | 3367 (4.9)            | 6,978 (4.5)            | 5199 (4.8)                              | 6031 (4.9)             | 11,230 (4.8)           | 1269835 (5.5)                                  | 1194802 (5.0)             | 2464643 (5.3)             |
| <b>&gt;15-20</b>              | 3581 (5.2)                                                        | 3253 (4.7)            | 6,834 (4.4)            | 5337 (5.0)                              | 6189 (5.0)             | 11,526 (5.0)           | 1188946 (5.2)                                  | 1113600 (4.7)             | 2302551 (4.9)             |
| <b>&gt;20-30</b>              | 8520 (12.3)                                                       | 9070 (13.1)           | 17,590 (11.4)          | 14419 (13.4)                            | 16723 (13.6)           | 31,142 (13.4)          | 2476624 (10.8)                                 | 2418216 (10.1)            | 4894851 (10.4)            |
| <b>&gt;30-40</b>              | 11318 (16.3)                                                      | 16291 (23.5)          | 27,609 (17.9)          | 19116 (17.8)                            | 22171 (18.0)           | 41,287 (17.8)          | 3239875 (14.1)                                 | 3248190 (13.6)            | 6488079 (13.8)            |
| <b>&gt;40-50</b>              | 10119 (14.6)                                                      | 14245 (20.6)          | 24,364 (15.8)          | 16031 (14.9)                            | 18594 (15.1)           | 34,625 (14.9)          | 3914804 (17.0)                                 | 3837041 (16.0)            | 7751862 (16.5)            |
| <b>&gt;50-60</b>              | 8512 (12.3)                                                       | 10271 (14.8)          | 18,783 (12.2)          | 12349 (11.5)                            | 14322 (11.6)           | 26,671 (11.5)          | 3356615 (14.6)                                 | 3431770 (14.3)            | 6788400 (14.5)            |
| <b>&gt;60-70</b>              | 7329 (10.6)                                                       | 8764 (12.7)           | 16,093 (10.4)          | 10199 (9.5)                             | 11829 (9.6)            | 22,028 (9.5)           | 2439786 (10.6)                                 | 2650101 (11.1)            | 5089898 (10.8)            |
| <b>&gt;70-80</b>              | 5997 (8.7)                                                        | 8056 (11.6)           | 14,052 (9.1)           | 8901 (8.3)                              | 10324 (8.4)            | 19,225 (8.3)           | 1614748 (7.0)                                  | 1975175 (8.3)             | 3589930 (7.6)             |
| <b>&gt;80</b>                 | 2542 (3.7)                                                        | 4859 (7.0)            | 7,401 (4.8)            | 4872 (4.5)                              | 5651 (4.6)             | 10,523 (4.5)           | 959627 (4.2)                                   | 1662367 (6.9)             | 2621998 (5.6)             |
| <b>Total (number/%)</b>       | <b>69,265 (100.0)</b>                                             | <b>85,255 (100.0)</b> | <b>154,520 (100.0)</b> | <b>107,622 (100.0)</b>                  | <b>123,196 (100.0)</b> | <b>232,446 (100.0)</b> | <b>23,007,724 (100.0)</b>                      | <b>23,926,081 (100.0)</b> | <b>46,933,905 (100.0)</b> |

1  
2  
3  
4 \*p-value <0.05: differences in the number of people having at least 1 imaging test in the study by sex in all age groups and in the  
5 total.  
6  
7  
8  
9  
10  
11  
12  
13  
14  
15  
16  
17  
18  
19  
20  
21  
22  
23  
24  
25  
26  
27  
28  
29  
30  
31  
32  
33  
34  
35  
36  
37  
38  
39  
40  
41  
42  
43  
44  
45  
46

For peer review only

1  
2  
3  
4  
5  
6  
7  
8  
9  
10  
11  
12  
13  
14  
15  
16  
17  
18  
19  
20  
21  
22  
23  
24  
25  
26  
27  
28  
29  
30  
31  
32  
33  
34  
35  
36  
37  
38  
39  
40  
41  
42  
43  
44  
45  
46  
47  
48  
49  
50  
51  
52  
53  
54  
55  
56  
57  
58  
59  
60

For peer review only

623 **Table 2. Number and percentage of each type of imaging test received, classified by sex and age during the period of**  
 624 **study.**

| Age at entry to study (years) | Number (%) of plain radiography* |                 |                   | Number (%) of computed tomography* |                 |                  | Number (%) of fluoroscopy* |                 |                  | Number (%) of interventional radiography* |            |                 |
|-------------------------------|----------------------------------|-----------------|-------------------|------------------------------------|-----------------|------------------|----------------------------|-----------------|------------------|-------------------------------------------|------------|-----------------|
|                               | Men                              | Women           | Total             | Men                                | Women           | Total            | Men                        | Women           | Total            | Men                                       | Women      | Total           |
| <b>0-5</b>                    | 17411<br>(3.7)                   | 16159<br>(2.6)  | 33,570<br>(3.0)   | 235 (0.3)                          | 188 (0.2)       | 423 (0.3)        | 239<br>(2.6)               | 302 (0.6)       | 541 (0.9)        | 4 (0.1)                                   | 0          | 4 (0.1)         |
| <b>5-10</b>                   | 20124<br>(4.3)                   | 16303<br>(2.6)  | 36,427<br>(3.3)   | 577 (0.7)                          | 473 (0.6)       | 1,050<br>(0.7)   | 362<br>(4.0)               | 286 (0.5)       | 648 (1.0)        | 8 (0.2)                                   | 6 (0.3)    | 14 (0.2)        |
| <b>10-15</b>                  | 20053<br>(4.3)                   | 15280<br>(2.4)  | 35,333<br>(3.2)   | 955 (1.2)                          | 748 (1.0)       | 1,703<br>(1.1)   | 298<br>(3.3)               | 312 (0.6)       | 610 (1.0)        | 21<br>(0.6)                               | 12 (0.5)   | 33 (0.6)        |
| <b>15-20</b>                  | 18408<br>(3.9)                   | 13866<br>(2.2)  | 32,274<br>(2.9)   | 1070<br>(1.3)                      | 780 (1.0)       | 1,850<br>(1.2)   | 214<br>(2.3)               | 356 (0.7)       | 570 (0.9)        | 21<br>(0.6)                               | 17 (0.7)   | 38 (0.7)        |
| <b>20-30</b>                  | 40301<br>(8.6)                   | 38689<br>(6.1)  | 78,990<br>(7.2)   | 3162<br>(4.0)                      | 3123<br>(4.1)   | 6,285<br>(4.0)   | 617<br>(6.7)               | 1461<br>(2.7)   | 2,078<br>(3.3)   | 58<br>(1.8)                               | 69 (2.9)   | 127 (2.2)       |
| <b>30-40</b>                  | 57707<br>(12.3)                  | 74139<br>(11.7) | 131,846<br>(12.0) | 6604<br>(8.3)                      | 6597<br>(8.6)   | 13,201<br>(8.4)  | 1139<br>(12.4)             | 3165<br>(5.9)   | 4,304<br>(6.8)   | 217<br>(6.6)                              | 110 (4.6)  | 327 (5.8)       |
| <b>40-50</b>                  | 61353<br>(13.1)                  | 92126<br>(14.5) | 153,479<br>(13.9) | 10918<br>(13.7)                    | 11691<br>(15.2) | 22,609<br>(14.4) | 1347<br>(14.7)             | 11746<br>(21.8) | 13,093<br>(20.7) | 401<br>(12.2)                             | 208 (8.7)  | 609 (10.7)      |
| <b>50-60</b>                  | 67366<br>(14.4)                  | 99223<br>(15.7) | 166,589<br>(15.1) | 16560<br>(20.8)                    | 14070<br>(18.3) | 30,630<br>(19.5) | 1809<br>(19.8)             | 17272<br>(32.0) | 19,081<br>(30.2) | 671<br>(20.4)                             | 402 (16.9) | 1,073<br>(18.9) |
| <b>60-70</b>                  | 75355                            | 109588          | 184,943           | 19665                              | 16763           | 36,428           | 1754                       | 12611           | 14,365           | 981                                       | 582 (24.4) | 1,563           |



|                        |                            |                            |                              |                           |                           |                            |                          |                           |                           |                          |                          |                          |
|------------------------|----------------------------|----------------------------|------------------------------|---------------------------|---------------------------|----------------------------|--------------------------|---------------------------|---------------------------|--------------------------|--------------------------|--------------------------|
|                        | (16.1)                     | (17.3)                     | (16.8)                       | (24.6)                    | (21.8)                    | (23.2)                     | (19.2)                   | (23.4)                    | (22.7)                    | (29.8)                   |                          | (27.6)                   |
| <b>70-80</b>           | 67088<br>(14.3)            | 110800<br>(17.5)           | 177,888<br>(16.2)            | 15925<br>(20.0)           | 16302<br>(21.2)           | 32,227<br>(20.5)           | 1130<br>(12.3)           | 5799<br>(10.7)            | 6,929<br>(11.0)           | 766<br>(23.3)            | 743 (31.2)               | 1,509<br>(26.6)          |
| <b>&gt;80</b>          | 22730<br>(4.9)             | 47008<br>(7.4)             | 69,738<br>(6.3)              | 4125<br>(5.2)             | 6317<br>(8.2)             | 10,442<br>(6.7)            | 250<br>(2.7)             | 688 (1.3)                 | 938 (1.5)                 | 140<br>(4.3)             | 233 (9.8)                | 373 (6.6)                |
| <b>Total<br/>(n/%)</b> | <b>467,373<br/>(100.0)</b> | <b>631,917<br/>(100.0)</b> | <b>1,110,077<br/>(100.0)</b> | <b>79,796<br/>(100.0)</b> | <b>77,052<br/>(100.0)</b> | <b>156,848<br/>(100.0)</b> | <b>9,159<br/>(100.0)</b> | <b>53,998<br/>(100.0)</b> | <b>63,157<br/>(100.0)</b> | <b>3,288<br/>(100.0)</b> | <b>2,382<br/>(100.0)</b> | <b>5,670<br/>(100.0)</b> |

625 \*p valor<0.05: differences by sex in in all age groups and in the total.

626

627

628

629

630

631

632

633

634

635

636

637

638

639 **Table 3. Cumulative diagnostic imaging tests per person exposed by sex and age during the period of study.**

| Age at entry to study (years) | Plain radiography (median/maximum) |          |          | Computed tomography (median/maximum) |        |         | Fluoroscopy (median/maximum) |        |         | Interventional radiography (median/maximum) |       |        |
|-------------------------------|------------------------------------|----------|----------|--------------------------------------|--------|---------|------------------------------|--------|---------|---------------------------------------------|-------|--------|
|                               | Men                                | Women    | Total    | Men                                  | Women  | Total   | Men                          | Women  | Total   | Men                                         | Women | Total  |
| <b>0-5</b>                    | 3 (40)                             | 3 (41)   | 3 (41)   | 1 (4)                                | 1 (5)  | 1 (5)   | 1 (8)                        | 1 (7)  | 1 (8)   | 1 (1)                                       | -     | 1 (1)  |
| <b>5-10</b>                   | 4 (40)                             | 4 (86)   | 4 (86)*  | 1 (17)                               | 1 (11) | 1 (17)  | 2 (8)                        | 1 (5)  | 2 (8)   | 1 (2)                                       | 1 (1) | 1 (2)  |
| <b>10-15</b>                  | 4 (72)                             | 3 (49)   | 4 (72)*  | 1 (11)                               | 1 (11) | 1 (11)* | 1 (8)                        | 1 (5)  | 1 (8)*  | 1 (7)                                       | 1 (3) | 1 (7)  |
| <b>15-20</b>                  | 4 (47)                             | 3 (64)   | 3 (64)*  | 1 (14)                               | 1 (13) | 1 (14)* | 1 (6)                        | 1 (6)  | 1 (6)   | 1 (2)                                       | 1 (2) | 1 (2)  |
| <b>20-30</b>                  | 3 (165)                            | 3 (62)   | 3 (165)* | 1 (36)                               | 1 (21) | 1 (36)  | 1 (5)                        | 1 (7)  | 1 (7)*  | 1 (3)                                       | 1 (9) | 1 (9)  |
| <b>30-40</b>                  | 3 (112)                            | 3 (80)   | 3 (112)* | 1 (29)                               | 2 (39) | 1 (39)* | 1 (8)                        | 1 (10) | 1 (10)* | 1 (4)                                       | 1 (3) | 1 (4)  |
| <b>40-50</b>                  | 4 (101)                            | 4 (373)  | 4 (373)* | 1 (44)                               | 2 (57) | 2 (57)* | 1 (7)                        | 2 (13) | 2 (13)* | 1 (6)                                       | 1 (5) | 1 (6)  |
| <b>50-60</b>                  | 5 (160)                            | 7 (95)   | 6 (160)* | 2 (62)                               | 2 (49) | 2 (62)* | 1 (18)                       | 2 (13) | 2 (18)* | 1 (7)                                       | 1 (5) | 1 (7)  |
| <b>60-70</b>                  | 7 (213)                            | 9 (173)  | 8 (213)* | 2 (71)                               | 3 (75) | 2 (75)* | 1 (10)                       | 2 (14) | 2 (14)* | 1 (9)                                       | 1 (6) | 1 (9)  |
| <b>70-80</b>                  | 8 (139)                            | 10 (559) | 9 (559)* | 2 (69)                               | 3 (74) | 2 (69)* | 1 (8)                        | 1 (11) | 1 (11)* | 1 (10)                                      | 1 (7) | 1 (10) |

|               |                |                |                 |               |               |                |               |               |                |               |              |               |
|---------------|----------------|----------------|-----------------|---------------|---------------|----------------|---------------|---------------|----------------|---------------|--------------|---------------|
| <b>&gt;80</b> | 6 (85)         | 7 (101)        | 7 (101)*        | 2 (23)        | 2 (35)        | 2 (35)*        | 1 (5)         | 1 (8)         | 1 (8)*         | 1 (4)         | 1 (5)        | 1 (5)         |
| <b>Total</b>  | <b>4 (213)</b> | <b>4 (559)</b> | <b>4 (559)*</b> | <b>2 (71)</b> | <b>2 (75)</b> | <b>2 (75)*</b> | <b>1 (18)</b> | <b>2 (14)</b> | <b>2 (18)*</b> | <b>1 (10)</b> | <b>1 (9)</b> | <b>1 (10)</b> |

640 <sup>a</sup>p valor<0.05

641

642

643

644

645

646

647

648

649

650

651

652

653

654

655

1  
2  
3  
4 656  
5  
6 657  
7  
8 658  
9  
10 659  
11  
12 660  
13  
14 661  
15  
16

**Table 4. Cumulative effective dose (mSv) per person exposed during the period of study.**

| Age at entry to study (years) | Total  |                 |         | Men    |                 |         | Women  |                 |         | p-value |
|-------------------------------|--------|-----------------|---------|--------|-----------------|---------|--------|-----------------|---------|---------|
|                               | Median | Percentil 25-75 | Maximum | Median | Percentil 25-75 | Maximum | Median | Percentil 25-75 | Maximum |         |
| <b>0-5</b>                    | 0.21   | 0.06-1.60       | 47.15   | 0.20   | 0.06-1.28       | 37.38   | 0.21   | 0.06-1.93       | 47.15   | 0.579   |
| <b>5-10</b>                   | 0.48   | 0.03-2.38       | 94.58   | 0.42   | 0.04-2.26       | 94.58   | 0.52   | 0.02-2.48       | 55.19   | 0.128   |
| <b>10-15</b>                  | 0.67   | 0.06-2.64       | 196.16  | 0.64   | 0.06-2.56       | 196.16  | 0.77   | 0.07-2.78       | 143.51  | 0.001   |
| <b>15-20</b>                  | 0.74   | 0.10-2.98       | 159.51  | 0.65   | 0.10-2.80       | 159.51  | 0.83   | 0.10-3.08       | 104.15  | 0.001   |
| <b>20-30</b>                  | 1.00   | 0.11-4.02       | 222.27  | 0.69   | 0.10-3.18       | 222.27  | 1.38   | 0.22-4.83       | 221.10  | <0.001  |
| <b>30-40</b>                  | 1.23   | 0.38-5.75       | 297.14  | 1.09   | 0.16-5.14       | 297.14  | 1.29   | 0.38-6.04       | 259.56  | 0.002   |
| <b>40-50</b>                  | 2.00   | 0.38-10.12      | 716.16  | 2.03   | 0.30-10.87      | 389.44  | 1.96   | 0.38-9.70       | 716.16  | 0.417   |
| <b>50-60</b>                  | 4.27   | 0.64-17.08      | 629.58  | 4.17   | 0.62-18.05      | 629.58  | 4.32   | 0.65-16.26      | 430.68  | 0.514   |

43  
44  
45  
46

|     |               |             |                   |                |             |                  |               |             |                   |                |                  |
|-----|---------------|-------------|-------------------|----------------|-------------|------------------|---------------|-------------|-------------------|----------------|------------------|
| 662 | <b>60-70</b>  | 8.35        | 1.47-25.72        | 506.08         | 9.80        | 1.47-29.21       | 506.08        | 7.63        | 1.48-23.46        | 489.57         | <0.001           |
| 663 | <b>70-80</b>  | 10.20       | 2.40-26.00        | 3980.30        | 12.05       | 2.60-30.46       | 502.08        | 8.81        | 2.18-23.21        | 3980.30        | <0.001           |
| 664 | <b>&gt;80</b> | 5.30        | 1.19-15.96        | 204.32         | 6.54        | 1.28-18.98       | 183.80        | 5.00        | 1.10-4.58         | 204.32         | <0.001           |
| 665 | <b>Total</b>  | <b>2.10</b> | <b>0.36-10.15</b> | <b>3980.30</b> | <b>1.90</b> | <b>0.2-10.20</b> | <b>629.58</b> | <b>2.38</b> | <b>0.38-10.10</b> | <b>3980.30</b> | <b>&lt;0.001</b> |

680 **Table 5. Number and percentage of people exposed according to the cumulative effective dose during the period of study.**

| Age at entry to study (years) | Total (number, percentage) |             |           | Men (number, percentage) |             |           | Women (number, percentage) |             |           | p-value |
|-------------------------------|----------------------------|-------------|-----------|--------------------------|-------------|-----------|----------------------------|-------------|-----------|---------|
|                               | 0-50 mSv                   | >50-100 mSv | >100 mSv  | 0-50 mSv                 | >50-100 mSv | >100 mSv  | 0-50 mSv                   | >50-100 mSv | >100 mSv  |         |
| <b>0-5</b>                    | 7,631 (100.0)              |             |           | 3938 (100.0)             |             |           | 3693 (100.0)               |             |           |         |
| <b>5-10</b>                   | 7,179 (99.9)               | 6 (0.1)     |           | 3793 (99.9)              | 5 (0.1)     |           | 3386 (100.0)               |             |           | 0.135   |
| <b>10-15</b>                  | 6,953 (99.6)               | 21 (0.3)    | 4 (0.3)   | 3597 (99.6)              | 11 (0.3)    | 3 (0.1)   | 3356 (99.7)                | 10 (0.3)    | 1         | 0.647   |
| <b>15-20</b>                  | 6,814 (99.7)               | 17 (0.2)    | 3 (0.1)   | 3570 (99.7)              | 9 (0.3)     | 2 (0.1)   | 3244 (99.7)                | 8 (0.2)     | 1         | 0.884   |
| <b>20-30</b>                  | 17,450 (99.2)              | 97 (0.6)    | 43 (0.2)  | 8462 (99.3)              | 39 (0.5)    | 19 (0.2)  | 8988 (99.1)                | 58 (0.6)    | 24 (0.3)  | 0.227   |
| <b>30-40</b>                  | 27,145 (98.3)              | 353 (1.3)   | 111 (0.4) | 11101 (98.2)             | 158 (1.4)   | 59 (0.5)  | 16044 (98.5)               | 195 (1.2)   | 52 (0.3)  | 0.011   |
| <b>40-50</b>                  | 23,358 (95.9)              | 656 (2.7)   | 350 (1.4) | 9678 (95.6)              | 295 (2.9)   | 146 (1.4) | 13680 (96.0)               | 361 (2.5)   | 204 (1.4) | 0.193   |
| <b>50-60</b>                  | 17,201 (91.6)              | 1,017 (5.4) | 565 (3.0) | 7681 (90.2)              | 506 (5.9)   | 325 (3.8) | 9520 (92.7)                | 511 (5.0)   | 240 (2.3) | <0.001  |
| <b>60-70</b>                  | 14,045 (87.3)              | 1,323 (8.2) | 725 (4.5) | 6227 (85.0)              | 694 (9.5)   | 408 (5.6) | 7818 (89.2)                | 629 (7.2)   | 317 (3.6) | <0.001  |
| <b>70-80</b>                  | 12,490 (88.9)              | 1,101 (7.8) | 462 (3.3) | 5151 (85.9)              | 594 (9.9)   | 252 (4.2) | 7339 (91.1)                | 507 (6.3)   | 210 (2.6) | <0.001  |

|     |               |                           |                        |                        |                         |                   |                   |                         |                   |                   |                  |
|-----|---------------|---------------------------|------------------------|------------------------|-------------------------|-------------------|-------------------|-------------------------|-------------------|-------------------|------------------|
| 681 | <b>&gt;80</b> | 7,113<br>(96.1)           | 253 (3.4)              | 35 (0.5)               | 2425<br>(95.4)          | 96 (3.8)          | 21 (0.8)          | 4688<br>(96.5)          | 157 (3.2)         | 14 (0.3)          | 0.003            |
| 682 | <b>Total</b>  | <b>147,379<br/>(95.4)</b> | <b>4,844<br/>(3.1)</b> | <b>2,298<br/>(1.5)</b> | <b>65623<br/>(94.7)</b> | <b>2407 (3.5)</b> | <b>1235 (1.8)</b> | <b>81756<br/>(95.9)</b> | <b>2437 (2.9)</b> | <b>1063 (1.2)</b> | <b>&lt;0.001</b> |

For peer review only

1  
2  
3  
4  
5  
6  
7  
8  
9  
10  
11  
12  
13  
14  
15  
16  
17  
18  
19  
20  
21  
22  
23  
24  
25  
26  
27  
28  
29  
30  
31  
32  
33  
34  
35  
36  
37  
38  
39  
40  
41  
42  
43  
44  
45  
46

694

695

696

697

698

699

700

701

702

703

704

705

For peer review only



1  
2  
3  
4  
5  
6  
7  
8  
9  
10  
11  
12  
13  
14  
15  
16  
17  
18  
19  
20  
21  
22  
23  
24  
25  
26  
27  
28  
29  
30  
31  
32  
33  
34  
35  
36  
37  
38  
39  
40  
41  
42  
43  
44  
45  
46

706

707

708

For peer review only

**Table S1. Imaging tests included and doses used per examination (mSv) (adults).**

| Tests                    | Anatomical sites                                                                            | Doses (mSv) |
|--------------------------|---------------------------------------------------------------------------------------------|-------------|
| Plain radiography        |                                                                                             |             |
|                          | Abdomen                                                                                     | 0.5         |
|                          | Cervical spine                                                                              | 0.05        |
|                          | Chest/Thorax                                                                                | 0.05        |
|                          | Lumbar spine                                                                                | 0.8         |
|                          | Pelvis/Hip                                                                                  | 0.37        |
|                          | Breast (incl. mammography)                                                                  | 0.64        |
|                          | Thoracic spine                                                                              | 0.50        |
|                          | Skull                                                                                       | 0.1         |
|                          | Knee                                                                                        | 0.005       |
|                          | Other extremities                                                                           | 0.001       |
|                          | Shoulder                                                                                    | 0.01        |
| Fluoroscopy              |                                                                                             |             |
|                          | Hysterosalpingography                                                                       | 1.95        |
|                          | Urography                                                                                   | 3.5         |
|                          | Ba enema                                                                                    | 5.8         |
|                          | Ba meal                                                                                     | 3.6         |
|                          | Ba follow-through                                                                           | 3.5         |
|                          | Endoscopic retrograde cholangiopancreatography                                              | 4.0         |
| Computed tomography      |                                                                                             |             |
|                          | Abdomen                                                                                     | 6.8         |
|                          | Chest                                                                                       | 7.0         |
|                          | Chest for pulmonary embolism                                                                | 15.0        |
|                          | Abdomen-chest                                                                               | 15.3        |
|                          | Head                                                                                        | 1.7         |
|                          | Neck                                                                                        | 3.0         |
|                          | Pelvis                                                                                      | 7.4         |
|                          | Abdomen and pelvis                                                                          | 10.0        |
|                          | Cervical spine                                                                              | 7.0         |
|                          | Trunk                                                                                       | 12.3        |
|                          | Skull                                                                                       | 2.0         |
|                          | Lumbar spine                                                                                | 6.0         |
|                          | Thoracic spine                                                                              | 7.0         |
| Interventional radiology |                                                                                             |             |
|                          | Head and/or neck angiography                                                                | 5.0         |
|                          | Coronary angiography (diagnostic)                                                           | 7.0         |
|                          | Coronary percutaneous transluminal angioplasty, stent placement, or radiofrequency ablation | 15.0        |
|                          | Thoracic angiography of pulmonary artery or aorta                                           | 5.0         |

|  |                                      |      |
|--|--------------------------------------|------|
|  | Abdominal angiography or aortography | 12.0 |
|--|--------------------------------------|------|

**Table S2. Imaging tests included and doses used per examination (mSv) (children).**

| Tests               | Anatomical sites | <1 year old           | >1-5 years old | >5-10 years old | >10-15 years old |
|---------------------|------------------|-----------------------|----------------|-----------------|------------------|
| Plain radiography   | Abdomen          | 0.07                  | 0.09           | 0.15            | 0.27             |
|                     | Cervical spine   | 0.02                  | 0.03           | 0.05            | 0.10             |
|                     | Chest/Thorax     | 0.05                  | 0.05           | 0.05            | 0.06             |
|                     | Lumbar spine     | 0.4                   | 0.5            | 0.6             | 0.8              |
|                     | Pelvis/Hip       | 0.08                  | 0.10           | 0.15            | 0.21             |
|                     | Thoracic spine   | 0.39                  | 0.41           | 0.77            | 1.18             |
|                     | Fluoroscopy      | Hysterosalpingography |                |                 |                  |
| Urography           |                  | 0.5                   | 0.5            | 0.7             | 1.0              |
| Ba enema            |                  | 2.3                   | 2.3            | 2.3             | 2.3              |
| Ba meal             |                  | 0.7                   | 0.6            | 0.9             | 1.0              |
| Ba follow-through   |                  | 1.2                   | 1.2            | 1.2             | 1.2              |
| Computed tomography | Abdomen          | 7.9                   | 7.9            | 7.9             | 7.9              |
|                     | Chest            | 3.9                   | 2.8            | 4.2             | 6.8              |
|                     | Head             | 1.7                   | 1.6            | 1.8             | 1.6              |
|                     | Pelvis           | 7.9                   | 7.9            | 7.9             | 7.9              |
|                     | Trunk            | 3.9                   | 3.0            | 5.6             | 8.3              |

1  
2  
3  
4  
5  
6  
7  
8  
9  
10  
11  
12  
13  
14  
15  
16  
17  
18  
19  
20  
21  
22  
23  
24  
25  
26  
27  
28  
29  
30  
31  
32  
33  
34  
35  
36  
37  
38  
39  
40  
41  
42  
43  
44  
45  
46

**Table S3. Cumulative effective dose (mSv) per person exposed during the period of study (plain radiography).**

| Age at entry to study (years) | Total       |                  |                | Men         |                  |              | Women       |                  |                | p-value          |
|-------------------------------|-------------|------------------|----------------|-------------|------------------|--------------|-------------|------------------|----------------|------------------|
|                               | Median      | Percentil 25-75  | Maximum        | Median      | Percentil 25-75  | Maximum      | Median      | Percentil 25-75  | Maximum        |                  |
| <b>0-5</b>                    | 0.20        | 0.06-1.01        | 47.14          | 0.20        | 0.06-0.90        | 26.34        | 0.20        | 0.06-1.16        | 47.14          | 0.453            |
| <b>5-10</b>                   | 0.39        | 0.04-1.42        | 24.90          | 0.38        | 0.04-1.30        | 24.90        | 0.40        | 0.02-1.53        | 23.40          | 0.456            |
| <b>10-15</b>                  | 0.64        | 0.10-1.28        | 14.64          | 0.64        | 0.10-1.28        | 14.64        | 0.64        | 0.10-1.38        | 13.14          | 0.097            |
| <b>15-20</b>                  | 0.64        | 0.20-1.28        | 23.26          | 0.64        | 0.12-1.28        | 14.96        | 0.64        | 0.30-1.38        | 23.26          | 0.043            |
| <b>20-30</b>                  | 0.64        | 0.38-1.88        | 30.01          | 0.64        | 0.20-1.34        | 22.51        | 0.64        | 0.46-1.92        | 30.01          | <0.001           |
| <b>30-40</b>                  | 0.74        | 0.48-2.08        | 46.73          | 0.64        | 0.26-1.58        | 36.48        | 0.64        | 0.64-2.86        | 46.73          | <0.001           |
| <b>40-50</b>                  | 1.02        | 0.64-2.16        | 716.15         | 0.64        | 0.48-1.92        | 26.39        | 1.28        | 0.64-2.56        | 716.15         | <0.001           |
| <b>50-60</b>                  | 1.28        | 0.64-2.54        | 54.27          | 0.94        | 0.64-1.92        | 41.31        | 1.28        | 0.64-2.56        | 54.27          | <0.001           |
| <b>60-70</b>                  | 1.28        | 0.64-2.68        | 51.02          | 1.28        | 0.64-2.56        | 44.78        | 1.28        | 0.64-3.20        | 51.02          | <0.001           |
| <b>70-80</b>                  | 1.28        | 0.64-3.10        | 2112.79        | 1.28        | 0.64-2.56        | 27.22        | 1.32        | 0.64-3.20        | 2112.79        | <0.001           |
| <b>&gt;80</b>                 | 1.28        | 0.64-2.66        | 33.34          | 1.28        | 0.64-2.56        | 19.97        | 1.28        | 0.64-3.08        | 33.34          | <0.001           |
| <b>Total</b>                  | <b>0.70</b> | <b>0.30-2.00</b> | <b>2112.79</b> | <b>0.64</b> | <b>0.20-1.90</b> | <b>44.78</b> | <b>1.02</b> | <b>0.40-2.56</b> | <b>2112.79</b> | <b>&lt;0.001</b> |

Table S4. Cumulative effective dose (mSv) per person exposed during the period of study (CT).

| Age at entry to study (years) | Total        |                   |                | Men          |                   |                | Women        |                   |                | p-value          |
|-------------------------------|--------------|-------------------|----------------|--------------|-------------------|----------------|--------------|-------------------|----------------|------------------|
|                               | Median       | Percentil 25-75   | Maximum        | Median       | Percentil 25-75   | Maximum        | Median       | Percentil 25-75   | Maximum        |                  |
| 0-5                           | 3.80         | 1.90-7.70         | 50.20          | 3.80         | 1.90-9.70         | 50.20          | 2.00         | 1.90-7.30         | 32.10          | 0.834            |
| 5-10                          | 3.90         | 1.90-9.70         | 93.00          | 4.00         | 1.90-9.70         | 93.00          | 3.80         | 1.90-9.70         | 74.40          | 0.414            |
| 10-15                         | 5.90         | 1.90-13.20        | 195.40         | 6.60         | 1.90-13.20        | 195.40         | 4.50         | 1.90-14.60        | 156.80         | 0.239            |
| 15-20                         | 5.80         | 1.90-19.35        | 316.40         | 6.60         | 1.90-17.00        | 316.40         | 5.00         | 1.90-22.60        | 165.00         | 0.146            |
| 20-30                         | 7.70         | 1.90-22.60        | 414.40         | 8.80         | 1.90-22.60        | 345.60         | 7.60         | 1.90-22.60        | 414.40         | 0.004            |
| 30-40                         | 9.70         | 1.90-22.60        | 558.30         | 9.70         | 3.80-22.60        | 558.30         | 9.70         | 1.90-22.60        | 458.60         | 0.439            |
| 40-50                         | 17.90        | 5.00-35.30        | 710.80         | 18.60        | 6.60-38.90        | 710.80         | 15.00        | 5.00-33.90        | 703.30         | 0.003            |
| 50-60                         | 22.60        | 6.60-45.90        | 1083.10        | 22.60        | 7.30-54.55        | 1083.10        | 19.80        | 6.60-41.20        | 732.40         | <0.001           |
| 60-70                         | 22.60        | 5.70-54.40        | 891.40         | 24.50        | 7.70-67.10        | 754.20         | 22.40        | 5.70-45.20        | 891.40         | <0.001           |
| 70-80                         | 22.60        | 3.80-45.20        | 1419.30        | 22.60        | 7.30-53.70        | 957.50         | 17.35        | 3.80-39.60        | 1419.30        | <0.001           |
| >80                           | 13.20        | 3.80-28.30        | 393.00         | 19.10        | 3.80-33.45        | 316.60         | 10.40        | 3.80-26.40        | 393.00         | <0.001           |
| <b>Total</b>                  | <b>16.30</b> | <b>3.80-35.90</b> | <b>1419.30</b> | <b>19.80</b> | <b>5.70-43.50</b> | <b>1083.10</b> | <b>13.20</b> | <b>3.80-31.80</b> | <b>1419.30</b> | <b>&lt;0.001</b> |

1  
2  
3  
4  
5  
6  
7  
8  
9  
10  
11  
12  
13  
14  
15  
16  
17  
18  
19  
20  
21  
22  
23  
24  
25  
26  
27  
28  
29  
30  
31  
32  
33  
34  
35  
36  
37  
38  
39  
40  
41  
42  
43  
44  
45  
46

For peer review only

## STROBE Statement—checklist of items that should be included in reports of observational studies

|                      |                          | Item No | Recommendation                                                                                                                                                                       |
|----------------------|--------------------------|---------|--------------------------------------------------------------------------------------------------------------------------------------------------------------------------------------|
| YES<br>Pages 1 and 3 | Title and abstract       | 1       | (a) Indicate the study's design with a commonly used term in the title or the abstract                                                                                               |
|                      |                          |         | (b) Provide in the abstract an informative and balanced summary of what was done and what was found                                                                                  |
|                      | <b>Introduction</b>      |         |                                                                                                                                                                                      |
| YES Pages 5-6        | Background/rationale     | 2       | Explain the scientific background and rationale for the investigation being reported                                                                                                 |
| YES Page 6           | Objectives               | 3       | State specific objectives, including any prespecified hypotheses                                                                                                                     |
|                      | <b>Methods</b>           |         |                                                                                                                                                                                      |
| YES Page 7           | Study design             | 4       | Present key elements of study design early in the paper                                                                                                                              |
| YES Page 7           | Setting                  | 5       | Describe the setting, locations, and relevant dates, including periods of recruitment, exposure, follow-up, and data collection                                                      |
| YES page 7           | Participants             | 6       | <i>Cross-sectional study</i> —Give the eligibility criteria, and the sources and methods of selection of participants                                                                |
| YES Pages 7-8        | Variables                | 7       | Clearly define all outcomes, exposures, predictors, potential confounders, and effect modifiers. Give diagnostic criteria, if applicable                                             |
| YES Pages 7-8        | Data sources/measurement | 8*      | For each variable of interest, give sources of data and details of methods of assessment (measurement). Describe comparability of assessment methods if there is more than one group |
| YES Page 8           | Bias                     | 9       | Describe any efforts to address potential sources of bias                                                                                                                            |
| NA                   | Study size               | 10      | Explain how the study size was arrived at                                                                                                                                            |
| YES Page 8           | Quantitative variables   | 11      | Explain how quantitative variables were handled in the analyses. If applicable, describe which groupings were chosen and why                                                         |
| YES Page 8           | Statistical methods      | 12      | (a) Describe all statistical methods, including those used to control for confounding                                                                                                |
|                      |                          |         | (b) Describe any methods used to examine subgroups and interactions                                                                                                                  |
|                      |                          |         | (c) Explain how missing data were addressed                                                                                                                                          |
|                      |                          |         | <i>Cross-sectional study</i> —If applicable, describe analytical methods taking account of sampling strategy                                                                         |
|                      |                          |         | (e) Describe any sensitivity analyses                                                                                                                                                |

Continued on next page

| <b>Results</b>                   |                  |     |                                                                                                                                                                                                              |
|----------------------------------|------------------|-----|--------------------------------------------------------------------------------------------------------------------------------------------------------------------------------------------------------------|
| <b>YES</b><br><b>Page 9</b>      | Participants     | 13* | (a) Report numbers of individuals at each stage of study—eg numbers potentially eligible, examined for eligibility, confirmed eligible, included in the study, completing follow-up, and analysed            |
|                                  |                  |     | (b) Give reasons for non-participation at each stage                                                                                                                                                         |
|                                  |                  |     | (c) Consider use of a flow diagram                                                                                                                                                                           |
| <b>YES</b><br><b>Page 9</b>      | Descriptive data | 14* | (a) Give characteristics of study participants (eg demographic, clinical, social) and information on exposures and potential confounders                                                                     |
|                                  |                  |     | (b) Indicate number of participants with missing data for each variable of interest                                                                                                                          |
|                                  |                  |     | (c) <i>Cohort study</i> —Summarise follow-up time (eg, average and total amount)                                                                                                                             |
| <b>YES</b><br><b>Page 9-11</b>   | Outcome data     | 15* | <i>Cohort study</i> —Report numbers of outcome events or summary measures over time                                                                                                                          |
|                                  |                  |     | <i>Case-control study</i> —Report numbers in each exposure category, or summary measures of exposure                                                                                                         |
|                                  |                  |     | <i>Cross-sectional study</i> —Report numbers of outcome events or summary measures                                                                                                                           |
| <b>YES</b><br><b>Page 9-11</b>   | Main results     | 16  | (a) Give unadjusted estimates and, if applicable, confounder-adjusted estimates and their precision (eg, 95% confidence interval). Make clear which confounders were adjusted for and why they were included |
|                                  |                  |     | (b) Report category boundaries when continuous variables were categorized                                                                                                                                    |
|                                  |                  |     | (c) If relevant, consider translating estimates of relative risk into absolute risk for a meaningful time period                                                                                             |
| <b>NA</b>                        | Other analyses   | 17  | Report other analyses done—eg analyses of subgroups and interactions, and sensitivity analyses                                                                                                               |
| <b>Discussion</b>                |                  |     |                                                                                                                                                                                                              |
| <b>YES</b><br><b>Page 12</b>     | Key results      | 18  | Summarise key results with reference to study objectives                                                                                                                                                     |
| <b>YES</b><br><b>Page 14</b>     | Limitations      | 19  | Discuss limitations of the study, taking into account sources of potential bias or imprecision. Discuss both direction and magnitude of any potential bias                                                   |
| <b>YES</b><br><b>Pages 12-13</b> | Interpretation   | 20  | Give a cautious overall interpretation of results considering objectives, limitations, multiplicity of analyses, results from similar studies, and other relevant evidence                                   |
| <b>YES</b><br><b>Page 15</b>     | Generalisability | 21  | Discuss the generalisability (external validity) of the study results                                                                                                                                        |
| <b>Other information</b>         |                  |     |                                                                                                                                                                                                              |
| <b>NA</b>                        | Funding          | 22  | Give the source of funding and the role of the funders for the present study and, if applicable, for the original study on which the present article is based                                                |

\*Give information separately for cases and controls in case-control studies and, if applicable, for exposed and unexposed groups in cohort and cross-sectional studies.

**Note:** An Explanation and Elaboration article discusses each checklist item and gives methodological background and published examples of transparent reporting. The STROBE checklist is best used in conjunction with this article (freely available on the Web sites of PLoS Medicine at <http://www.plosmedicine.org/>, Annals of Internal Medicine at <http://www.annals.org/>, and Epidemiology at <http://www.epidem.com/>). Information on the STROBE Initiative is available at [www.strobe-statement.org](http://www.strobe-statement.org).
