# Supplementary material for: Cumulative exposure to ionising radiation from diagnostic imaging tests: a 12-year follow-up population-based analysis in Spain
Source: PubMed Central journal article supplement — BMJ Open. 2019 Sep 18;9(9):e030905. doi: 10.1136/bmjopen-2019-030905 (PMC6756468; doi:10.1136/bmjopen-2019-030905), 2019-09-18
Supplement: bmjopen-2019-030905supp001.pdf [file bmjopen-2019-030905supp001.pdf]

**Table S1. Imaging tests included and doses used per examination (mSv) (adults).**

| Tests                                             | Anatomical sites                                                                            | Doses (mSv) |
|---------------------------------------------------|---------------------------------------------------------------------------------------------|-------------|
| Plain radiography                                 | Abdomen                                                                                     | 0.5         |
|                                                   | Cervical spine                                                                              | 0.05        |
|                                                   | Chest/Thorax                                                                                | 0.05        |
|                                                   | Lumbar spine                                                                                | 0.8         |
|                                                   | Pelvis/Hip                                                                                  | 0.37        |
|                                                   | Breast (incl. mammography)                                                                  | 0.64        |
|                                                   | Thoracic spine                                                                              | 0.50        |
|                                                   | Skull                                                                                       | 0.1         |
|                                                   | Knee                                                                                        | 0.005       |
|                                                   | Other extremities                                                                           | 0.001       |
|                                                   | Shoulder                                                                                    | 0.01        |
| Fluoroscopy                                       | Hysterosalpingography                                                                       | 1.95        |
|                                                   | Urography                                                                                   | 3.5         |
|                                                   | Ba enema                                                                                    | 5.8         |
|                                                   | Ba meal                                                                                     | 3.6         |
|                                                   | Ba follow-through                                                                           | 3.5         |
|                                                   | Endoscopic retrograde cholangiopancreatography                                              | 4.0         |
| Computed tomography                               | Abdomen                                                                                     | 6.8         |
|                                                   | Chest                                                                                       | 7.0         |
|                                                   | Chest for pulmonary embolism                                                                | 15.0        |
|                                                   | Abdomen-chest                                                                               | 15.3        |
|                                                   | Head                                                                                        | 1.7         |
|                                                   | Neck                                                                                        | 3.0         |
|                                                   | Pelvis                                                                                      | 7.4         |
|                                                   | Abdomen and pelvis                                                                          | 10.0        |
|                                                   | Cervical spine                                                                              | 7.0         |
|                                                   | Trunk                                                                                       | 12.3        |
|                                                   | Skull                                                                                       | 2.0         |
| Interventional radiology                          | Lumbar spine                                                                                | 6.0         |
|                                                   | Thoracic spine                                                                              | 7.0         |
|                                                   | Head and/or neck angiography                                                                | 5.0         |
|                                                   | Coronary angiography (diagnostic)                                                           | 7.0         |
|                                                   | Coronary percutaneous transluminal angioplasty, stent placement, or radiofrequency ablation | 15.0        |
| Thoracic angiography of pulmonary artery or aorta | 5.0                                                                                         |             |

|  |                                      |      |
|--|--------------------------------------|------|
|  | Abdominal angiography or aortography | 12.0 |
|--|--------------------------------------|------|

**Table S2. Imaging tests included and doses used per examination (mSv) (children).**

| Tests               | Anatomical sites | <1 year old           | >1-5 years old | >5-10 years old | >10-15 years old |
|---------------------|------------------|-----------------------|----------------|-----------------|------------------|
| Plain radiography   | Abdomen          | 0.07                  | 0.09           | 0.15            | 0.27             |
|                     | Cervical spine   | 0.02                  | 0.03           | 0.05            | 0.10             |
|                     | Chest/Thorax     | 0.05                  | 0.05           | 0.05            | 0.06             |
|                     | Lumbar spine     | 0.4                   | 0.5            | 0.6             | 0.8              |
|                     | Pelvis/Hip       | 0.08                  | 0.10           | 0.15            | 0.21             |
|                     | Thoracic spine   | 0.39                  | 0.41           | 0.77            | 1.18             |
|                     | Fluoroscopy      | Hysterosalpingography |                |                 |                  |
| Urography           |                  | 0.5                   | 0.5            | 0.7             | 1.0              |
| Ba enema            |                  | 2.3                   | 2.3            | 2.3             | 2.3              |
| Ba meal             |                  | 0.7                   | 0.6            | 0.9             | 1.0              |
| Ba follow-through   |                  | 1.2                   | 1.2            | 1.2             | 1.2              |
| Computed tomography | Abdomen          | 7.9                   | 7.9            | 7.9             | 7.9              |
|                     | Chest            | 3.9                   | 2.8            | 4.2             | 6.8              |
|                     | Head             | 1.7                   | 1.6            | 1.8             | 1.6              |
|                     | Pelvis           | 7.9                   | 7.9            | 7.9             | 7.9              |
|                     | Trunk            | 3.9                   | 3.0            | 5.6             | 8.3              |

Table S3. Cumulative effective dose (mSv) per person exposed during the period of study (plain radiography).

| Age at entry to study (years) | Total       |                  |                | Men         |                  |              | Women       |                  |                | p-value          |
|-------------------------------|-------------|------------------|----------------|-------------|------------------|--------------|-------------|------------------|----------------|------------------|
|                               | Median      | Percentil 25-75  | Maximum        | Median      | Percentil 25-75  | Maximum      | Median      | Percentil 25-75  | Maximum        |                  |
| <b>0-5</b>                    | 0.20        | 0.06-1.01        | 47.14          | 0.20        | 0.06-0.90        | 26.34        | 0.20        | 0.06-1.16        | 47.14          | 0.453            |
| <b>5-10</b>                   | 0.39        | 0.04-1.42        | 24.90          | 0.38        | 0.04-1.30        | 24.90        | 0.40        | 0.02-1.53        | 23.40          | 0.456            |
| <b>10-15</b>                  | 0.64        | 0.10-1.28        | 14.64          | 0.64        | 0.10-1.28        | 14.64        | 0.64        | 0.10-1.38        | 13.14          | 0.097            |
| <b>15-20</b>                  | 0.64        | 0.20-1.28        | 23.26          | 0.64        | 0.12-1.28        | 14.96        | 0.64        | 0.30-1.38        | 23.26          | 0.043            |
| <b>20-30</b>                  | 0.64        | 0.38-1.88        | 30.01          | 0.64        | 0.20-1.34        | 22.51        | 0.64        | 0.46-1.92        | 30.01          | <0.001           |
| <b>30-40</b>                  | 0.74        | 0.48-2.08        | 46.73          | 0.64        | 0.26-1.58        | 36.48        | 0.64        | 0.64-2.86        | 46.73          | <0.001           |
| <b>40-50</b>                  | 1.02        | 0.64-2.16        | 716.15         | 0.64        | 0.48-1.92        | 26.39        | 1.28        | 0.64-2.56        | 716.15         | <0.001           |
| <b>50-60</b>                  | 1.28        | 0.64-2.54        | 54.27          | 0.94        | 0.64-1.92        | 41.31        | 1.28        | 0.64-2.56        | 54.27          | <0.001           |
| <b>60-70</b>                  | 1.28        | 0.64-2.68        | 51.02          | 1.28        | 0.64-2.56        | 44.78        | 1.28        | 0.64-3.20        | 51.02          | <0.001           |
| <b>70-80</b>                  | 1.28        | 0.64-3.10        | 2112.79        | 1.28        | 0.64-2.56        | 27.22        | 1.32        | 0.64-3.20        | 2112.79        | <0.001           |
| <b>&gt;80</b>                 | 1.28        | 0.64-2.66        | 33.34          | 1.28        | 0.64-2.56        | 19.97        | 1.28        | 0.64-3.08        | 33.34          | <0.001           |
| <b>Total</b>                  | <b>0.70</b> | <b>0.30-2.00</b> | <b>2112.79</b> | <b>0.64</b> | <b>0.20-1.90</b> | <b>44.78</b> | <b>1.02</b> | <b>0.40-2.56</b> | <b>2112.79</b> | <b>&lt;0.001</b> |

Table S4. Cumulative effective dose (mSv) per person exposed during the period of study (CT).

| Age at entry to study (years) | Total        |                   |                | Men          |                   |                | Women        |                   |                | p-value          |
|-------------------------------|--------------|-------------------|----------------|--------------|-------------------|----------------|--------------|-------------------|----------------|------------------|
|                               | Median       | Percentil 25-75   | Maximum        | Median       | Percentil 25-75   | Maximum        | Median       | Percentil 25-75   | Maximum        |                  |
| 0-5                           | 3.80         | 1.90-7.70         | 50.20          | 3.80         | 1.90-9.70         | 50.20          | 2.00         | 1.90-7.30         | 32.10          | 0.834            |
| 5-10                          | 3.90         | 1.90-9.70         | 93.00          | 4.00         | 1.90-9.70         | 93.00          | 3.80         | 1.90-9.70         | 74.40          | 0.414            |
| 10-15                         | 5.90         | 1.90-13.20        | 195.40         | 6.60         | 1.90-13.20        | 195.40         | 4.50         | 1.90-14.60        | 156.80         | 0.239            |
| 15-20                         | 5.80         | 1.90-19.35        | 316.40         | 6.60         | 1.90-17.00        | 316.40         | 5.00         | 1.90-22.60        | 165.00         | 0.146            |
| 20-30                         | 7.70         | 1.90-22.60        | 414.40         | 8.80         | 1.90-22.60        | 345.60         | 7.60         | 1.90-22.60        | 414.40         | 0.004            |
| 30-40                         | 9.70         | 1.90-22.60        | 558.30         | 9.70         | 3.80-22.60        | 558.30         | 9.70         | 1.90-22.60        | 458.60         | 0.439            |
| 40-50                         | 17.90        | 5.00-35.30        | 710.80         | 18.60        | 6.60-38.90        | 710.80         | 15.00        | 5.00-33.90        | 703.30         | 0.003            |
| 50-60                         | 22.60        | 6.60-45.90        | 1083.10        | 22.60        | 7.30-54.55        | 1083.10        | 19.80        | 6.60-41.20        | 732.40         | <0.001           |
| 60-70                         | 22.60        | 5.70-54.40        | 891.40         | 24.50        | 7.70-67.10        | 754.20         | 22.40        | 5.70-45.20        | 891.40         | <0.001           |
| 70-80                         | 22.60        | 3.80-45.20        | 1419.30        | 22.60        | 7.30-53.70        | 957.50         | 17.35        | 3.80-39.60        | 1419.30        | <0.001           |
| >80                           | 13.20        | 3.80-28.30        | 393.00         | 19.10        | 3.80-33.45        | 316.60         | 10.40        | 3.80-26.40        | 393.00         | <0.001           |
| <b>Total</b>                  | <b>16.30</b> | <b>3.80-35.90</b> | <b>1419.30</b> | <b>19.80</b> | <b>5.70-43.50</b> | <b>1083.10</b> | <b>13.20</b> | <b>3.80-31.80</b> | <b>1419.30</b> | <b>&lt;0.001</b> |
